# Supplementary material for: Efficacy and Synergy of Small Molecule Inhibitors Targeting FLT3-ITD+ Acute Myeloid Leukemia
Source: Cancers (Basel). 2021 Dec 8;13(24):6181. doi: 10.3390/cancers13246181 (PMC8699584; doi:10.3390/cancers13246181)
Supplement: Supplementary file 1 [file cancers-13-06181-s001.zip › cancers-1494412-Table S1_drug_screen.xlsx]

## Sheet: Sheet1
CellLine	CompoundName	POC_Norm_noOutliers			CellLine	CompoundName	POC_Norm_noOutliers
Molm13	WS6	-19.3585			Mv4-11	Gemcitabine	-18.4349
Molm13	GZD824	-17.5742			Mv4-11	GZD824 Dimesylate	-16.5663
Molm13	AZD 7762	-13.9826			Mv4-11	GZD824	-15.0419
Molm13	GZD824	-9.45085			Mv4-11	GZD824	-14.5359
Molm13	AZD 7762	-8.50108			Mv4-11	AZD 7762	-12.7721
Molm13	SB715992(Ispinesib)	-7.36611			Mv4-11	WS6	-11.0071
Molm13	Paclitaxel	-5.691			Mv4-11	Foretinib (GSK1363089)	-7.76544
Molm13	Gemcitabine	-4.97488			Mv4-11	AZD 7762	-6.89488
Molm13	SB743921	-3.39573			Mv4-11	SB743921	-4.84477
Molm13	AP24534 Ponatinib	-2.12132			Mv4-11	Paclitaxel	-4.06831
Molm13	GZD824 Dimesylate	-0.100557			Mv4-11	Paclitaxel	-3.71959
Molm13	Paclitaxel	1.03003			Mv4-11	GZD824 Dimesylate	-1.96916
Molm13	WS3	1.72826			Mv4-11	SB715992(Ispinesib)	-0.891543
Molm13	Staurosporine	2.59301			Mv4-11	AP24534 Ponatinib	0.100956
Molm13	Quizartinib (AC220)	2.90594			Mv4-11	Quizartinib (AC220)	1.65332
Molm13	Staurosporine	2.92719			Mv4-11	Staurosporine	1.65593
Molm13	Gemcitabine	2.99401			Mv4-11	SB743921	3.44514
Molm13	Staurosporine	3.75607			Mv4-11	Staurosporine	4.06864
Molm13	CTx0294885	8.1964			Mv4-11	Quizartinib (AC220)	5.77276
Molm13	GZD824 Dimesylate	8.23394			Mv4-11	Staurosporine	6.16846
Molm13	SB743921	8.76377			Mv4-11	AP24534 Ponatinib	6.51118
Molm13	XL184(Cabozantinib malate)	9.39952			Mv4-11	Gemcitabine	6.90821
Molm13	Crenolanib	12.1934			Mv4-11	Staurosporine	9.75444
Molm13	Foretinib (GSK1363089)	12.5969			Mv4-11	SB715992(Ispinesib)	13.4323
Molm13	SB715992(Ispinesib)	13.0276			Mv4-11	Crenolanib	14.079
Molm13	WS6	13.0326			Mv4-11	WS6	16.9704
Molm13	Quizartinib (AC220)	15.8338			Mv4-11	WS3	17.8577
Molm13	Foretinib (GSK1363089)	16.0613			Mv4-11	CTx0294885	18.2041
Molm13	AP24534 Ponatinib	16.098			Mv4-11	Crenolanib	22.2494
Molm13	WS3	16.9379			Mv4-11	WS3	23.728
Molm13	Crenolanib	17.5508			Mv4-11	CTx0294885	27.864
Molm13	Cabozantinib (XL184, BMS-907351)	18.0699			Mv4-11	AZD2932	28.2575
Molm13	XL184(Cabozantinib malate)	20.6023			Mv4-11	PIK-75	28.7818
Molm13	AZD2932	21.7725			Mv4-11	AZD2932	31.3002
Molm13	CTx0294885	26.6253			Mv4-11	Rapamycin (Sirolimus)	32.7205
Molm13	AZD2932	27.7647			Mv4-11	PIK-75	34.557
Molm13	Rapamycin (Sirolimus)	28.3536			Mv4-11	Bisindolylmaleimide I	35.7076
Molm13	Staurosporine	38.2306			Mv4-11	XL184(Cabozantinib malate)	37.4363
Molm13	Rapamycin (Sirolimus)	40.3497			Mv4-11	Foretinib (GSK1363089)	39.2787
Molm13	Cabozantinib (XL184, BMS-907351)	41.0404			Mv4-11	Sorafenib	41.1215
Molm13	BAY 43-9006	42.6639			Mv4-11	BAY 43-9006	41.4712
Molm13	Sunitinib (malate)	46.2728			Mv4-11	Cabozantinib (XL184, BMS-907351)	41.8159
Molm13	BAY 43-9006	47.3051			Mv4-11	XL184(Cabozantinib malate)	46.618
Molm13	GSK2126458(Omipalisib)	47.9086			Mv4-11	Cabozantinib (XL184, BMS-907351)	47.1151
Molm13	BPR1J-097	48.5096			Mv4-11	BAY 43-9006	48.961
Molm13	Sorafenib	48.8115			Mv4-11	RGB-286638 free base	49.4254
Molm13	PIK-75	50.9699			Mv4-11	Rapamycin (Sirolimus)	53.7965
Molm13	ZM 447439	52.328			Mv4-11	Sorafenib	54.3946
Molm13	Dorsomorphin dihydrochloride	53.5531			Mv4-11	3-Methyladenine (3-MA)	60.903
Molm13	Sunitinib (malate)	54.3135			Mv4-11	RGB-286638 free base	61.7827
Molm13	Barasertib (AZD1152-HQPA)	54.8819			Mv4-11	Sorafenib tosylate	62.025
Molm13	SNS-314 Mesylate	55.6273			Mv4-11	Sunitinib (malate)	62.5745
Molm13	BMS794833	56.9086			Mv4-11	Dorsomorphin dihydrochloride	63.1403
Molm13	Sodium†Dichloroacetate	57.4306			Mv4-11	Sunitinib (malate)	64.2228
Molm13	BI 2536	57.8483			Mv4-11	Linifanib (ABT-869)	64.6747
Molm13	Sorafenib tosylate	58.4295			Mv4-11	Dorsomorphin dihydrochloride	68.2101
Molm13	Sorafenib	58.5455			Mv4-11	SC-1	68.7727
Molm13	Linifanib (ABT-869)	58.9913			Mv4-11	SC-1	68.7798
Molm13	CaMKP Inhibitor	59.7544			Mv4-11	Barasertib (AZD1152-HQPA)	69.7724
Molm13	Cucurbitacin B	61.008			Mv4-11	LY2228820	69.8597
Molm13	PIK-75	62.2129			Mv4-11	BS-181	71.6542
Molm13	Cucurbitacin B	62.4143			Mv4-11	NVP-AEW541 (hydrochloride)	72.9888
Molm13	Miltefosine	62.4201			Mv4-11	PKC-412(Midostaurin)	73.5533
Molm13	Dorsomorphin dihydrochloride	63.0729			Mv4-11	GSK2126458(Omipalisib)	74.743
Molm13	Dasatinib monohydrate	63.1632			Mv4-11	PP242	74.9722
Molm13	2,3-Butanedione 2-Monoxime	64.4573			Mv4-11	2-Chloropyrazine	75.5331
Molm13	Linifanib (ABT-869)	64.5926			Mv4-11	OTSSP167	75.7344
Molm13	BMS794833	64.9039			Mv4-11	Dinaciclib (SCH727965)	75.9234
Molm13	ABT-869	65.1735			Mv4-11	Sorafenib tosylate	76.3642
Molm13	GNF-7	65.5483			Mv4-11	Indirubin-3'-monoxime	77.4604
Molm13	PLX647	65.848			Mv4-11	GSK2126458(Omipalisib)	77.4887
Molm13	CAY10554	66.7638			Mv4-11	AS-703026	77.8176
Molm13	SB216763	67.5327			Mv4-11	PD 0325901	78.3916
Molm13	Sorafenib tosylate	67.733			Mv4-11	BPR1J-097	78.5526
Molm13	PIK-inhibitors	69.1307			Mv4-11	Bosutinib	78.6975
Molm13	ST638	69.5899			Mv4-11	DB07268	79.5129
Molm13	Phenformin hydrochloride	70.1556			Mv4-11	AS-604850	79.5901
Molm13	SC-1	70.3292			Mv4-11	Cucurbitacin B	79.8422
Molm13	BX912	70.3723			Mv4-11	Sennoside B	80.2675
Molm13	RGB-286638 free base	70.8643			Mv4-11	BMS794833	80.4274
Molm13	BAY 11-7082	70.9428			Mv4-11	BX912	80.8137
Molm13	RGB-286638 free base	71.1115			Mv4-11	KW2449	81.0785
Molm13	Danusertib (PHA-739358)	71.1759			Mv4-11	BX912	81.5007
Molm13	TAK901	71.2978			Mv4-11	Tideglusib	81.5789
Molm13	BI 2536	71.4783			Mv4-11	CHIR98014	82.0702
Molm13	Streptozocin	72.1697			Mv4-11	KU55933	82.4849
Molm13	BIBF 1120	72.5012			Mv4-11	SCH772984	82.6829
Molm13	R112	72.5218			Mv4-11	XMD17-109	82.8102
Molm13	Ellagic acid	72.6762			Mv4-11	PIK-93	82.9661
Molm13	CAY10626	72.825			Mv4-11	Linifanib (ABT-869)	83.047
Molm13	PI3K-IN-2	72.8943			Mv4-11	PIK-294	83.3943
Molm13	Apigenin	73.1301			Mv4-11	AG-183	83.6067
Molm13	MRT67307	73.4466			Mv4-11	5-Iodotubercidin	83.6329
Molm13	Dinaciclib (SCH727965)	73.4589			Mv4-11	A 769662	83.8572
Molm13	SNS-314 Mesylate	73.8689			Mv4-11	Indirubin-3'-monoxime	83.8948
Molm13	PKC 412	74.0942			Mv4-11	KenPaullone	84.1141
Molm13	BPR1J-097	74.3513			Mv4-11	IM-12	84.1412
Molm13	Semaxanib (SU5416)	74.3937			Mv4-11	AZD2014	84.4714
Molm13	Brivanib Alaninate (BMS-582664)	74.5558			Mv4-11	SNS-314 Mesylate	84.5604
Molm13	Pazopanib	74.9821			Mv4-11	Dequalinium chloride	84.8061
Molm13	GSK2126458(Omipalisib)	75.0721			Mv4-11	SNS-314 Mesylate	84.9313
Molm13	Leflunomide	75.0812			Mv4-11	HMN214	84.9655
Molm13	Barasertib (AZD1152-HQPA)	75.4368			Mv4-11	Decernotinib(VX-509)	85.0454
Molm13	THZ1	75.5565			Mv4-11	6-BIO	85.1957
Molm13	BX912	75.6403			Mv4-11	NG-52	85.3041
Molm13	LY294002	76.211			Mv4-11	KN-93	85.3804
Molm13	Gandotinib (LY2784544)	76.2542			Mv4-11	OTSSP167	85.3879
Molm13	kb NB 142-70	76.2785			Mv4-11	BI 2536	85.4722
Molm13	Pyridoxine	76.7856			Mv4-11	R112	85.477
Molm13	Cobimetinib	77.3342			Mv4-11	BMS794833	85.6738
Molm13	CAY10576	77.399			Mv4-11	MRT67307	85.7131
Molm13	Adenosine 5'-monophosphate monohydrate	77.6552			Mv4-11	INK128	85.801
Molm13	Ginsenoside Rg2	78.0282			Mv4-11	PF-477736	85.8104
Molm13	WHI-P154	78.1116			Mv4-11	SB1317	85.8221
Molm13	SC-1	78.1293			Mv4-11	Cucurbitacin B	85.9241
Molm13	CAL-101 (Idelalisib, GS-1101)	78.286			Mv4-11	Crizotinib (PF-02341066)	85.9502
Molm13	PKC 412	78.3221			Mv4-11	PF 431396	85.98
Molm13	Momordin Ic	78.416			Mv4-11	Necrostatin-1	86.2935
Molm13	AG-183	78.546			Mv4-11	CCT018159	86.3426
Molm13	TAK901	78.8078			Mv4-11	AS-605240	86.4142
Molm13	NSC 210902	79.0649			Mv4-11	INK128	86.518
Molm13	Indirubin-3'-monoxime	79.0885			Mv4-11	Semaxanib (SU5416)	86.5933
Molm13	MK1775	79.1334			Mv4-11	LY2090314	86.6438
Molm13	Defactinib (VS-6063, PF-04554878)	79.1526			Mv4-11	PIK-75 (hydrochloride)	86.6523
Molm13	ABT-869	79.165			Mv4-11	AP26113	86.7676
Molm13	Myricetrin	79.4322			Mv4-11	Ginsenoside Rg2	87.0209
Molm13	Palbociclib (PD0332991) Isethionate	79.4858			Mv4-11	PKC 412	87.3519
Molm13	Carbazochrome	79.5967			Mv4-11	Myricetrin	87.4189
Molm13	Betaine hydrochloride	79.7499			Mv4-11	PD0325901	87.4596
Molm13	NU 6102	79.9919			Mv4-11	VX-702	87.4672
Molm13	CZC24832	80.3273			Mv4-11	Entrectinib	87.5338
Molm13	RKI-1447	80.4665			Mv4-11	SGI-1776 free base	87.7782
Molm13	SBI-0206965	80.6121			Mv4-11	Verbascoside	87.8041
Molm13	L-779,450	80.807			Mv4-11	Brigatinib	87.9775
Molm13	INK128	80.9792			Mv4-11	TAK901	88.1318
Molm13	VE-821	81.1934			Mv4-11	Tivozanib (AV-951)	88.163
Molm13	Oclacitinib	81.3515			Mv4-11	ASP 3026	88.2388
Molm13	Dequalinium chloride	81.4236			Mv4-11	PKC 412	88.2873
Molm13	WH-4-023	81.4376			Mv4-11	Isoprenaline hydrochloride	88.3291
Molm13	GDC-0941	81.4744			Mv4-11	Vandetanib (ZD6474)	88.5144
Molm13	Palbociclib	81.5034			Mv4-11	AS-252424	88.5358
Molm13	(R)-Ruxolitinib (INCB018424)	81.7683			Mv4-11	VE822	88.5904
Molm13	Filgotinib (GLPG0634)	82.1929			Mv4-11	Barasertib (AZD1152-HQPA)	88.6944
Molm13	Motesanib Diphosphate (AMG-706)	82.1943			Mv4-11	LY294002	88.881
Molm13	DB07268	82.2765			Mv4-11	AG-825	89.0291
Molm13	Sunitinib Malate	82.294			Mv4-11	AZD3463	89.1092
Molm13	Afatinib (BIBW2992)	82.3698			Mv4-11	PD184352 (CI-1040)	89.266
Molm13	NU2058	82.5394			Mv4-11	R788 (Fostamatinib) Disodium	89.3113
Molm13	Entrectinib	82.6001			Mv4-11	AS601245	89.3858
Molm13	Rigosertib (ON-01910)	82.8292			Mv4-11	Proglumide	89.5425
Molm13	Loxiglumide	82.8403			Mv4-11	Erlotinib	89.6366
Molm13	OTSSP167	82.853			Mv4-11	ML-9	89.6618
Molm13	Nintedanib (BIBF 1120)	83.1346			Mv4-11	(S)-Glycyl-H-1152 (hydrochloride)	89.7283
Molm13	AZD2014	83.2459			Mv4-11	Ibrutinib (PCI-32765)	89.9383
Molm13	TWS119	83.254			Mv4-11	NQDI-1	90.0705
Molm13	Pimasertib (AS-703026)	83.2758			Mv4-11	Metformin hydrochloride	90.0944
Molm13	AZD2858	83.446			Mv4-11	Phthalazinone pyrazole	90.4651
Molm13	Tyrphostin 9	83.4706			Mv4-11	AZD-9291 mesylate	90.5473
Molm13	LDN-193189	83.525			Mv4-11	ABT-869	90.5506
Molm13	SCH772984	83.5845			Mv4-11	NG-52	90.5685
Molm13	PF-4708671	83.6969			Mv4-11	5-Iodotubercidin	90.5873
Molm13	Trametinib (GSK1120212)	83.7017			Mv4-11	Imatinib (STI571)	90.672
Molm13	PIK-90	83.7241			Mv4-11	Metformin hydrochloride	90.872
Molm13	LY-364947	83.7531			Mv4-11	SC-514	91.0187
Molm13	Perifosine (KRX-0401)	83.8122			Mv4-11	Amlexanox	91.0364
Molm13	Sunitinib Malate	83.8949			Mv4-11	BYL-719(Alpelisib)	91.2433
Molm13	Gˆ 6983	83.9711			Mv4-11	PND-1186	91.6096
Molm13	Sotrastaurin	83.9834			Mv4-11	Ellagic acid	91.7382
Molm13	PF670462	84.0122			Mv4-11	Osu-03012	91.7417
Molm13	Bisindolylmaleimide I	84.0219			Mv4-11	GNF-7	91.7791
Molm13	GNF-7	84.0434			Mv4-11	IC261	91.9522
Molm13	Nintedanib (BIBF 1120)	84.108			Mv4-11	(R)-Roscovitine	91.9596
Molm13	AZD2014	84.1315			Mv4-11	FLT3-IN-2	92.1678
Molm13	AZD3463	84.1925			Mv4-11	CAY10554	92.1772
Molm13	CCT137690	84.2518			Mv4-11	2-Methoxy-1,4-naphthoquinone	92.218
Molm13	Canertinib (hydrochloride)	84.3195			Mv4-11	PIK-inhibitors	92.2406
Molm13	PIK-294	84.3454			Mv4-11	Fedratinib (SAR302503, TG101348)	92.3927
Molm13	ALK inhibitor 2	84.6422			Mv4-11	Diosmetin	92.3936
Molm13	Mutant EGFR inhibitor	84.7631			Mv4-11	ALK inhibitor 2	92.4027
Molm13	Ruboxistaurin hydrochloride	84.8749			Mv4-11	BPR1J-097	92.4914
Molm13	SB 202190	84.9194			Mv4-11	TDZD-8	92.7435
Molm13	1NM-PP1	84.9461			Mv4-11	XL019	92.7482
Molm13	ID-8	84.9671			Mv4-11	Afatinib (BIBW2992)	92.858
Molm13	SKLB 610	85.07			Mv4-11	CCT137690	92.9712
Molm13	TGX-221	85.1199			Mv4-11	kb NB 142-70	92.9762
Molm13	PD-173955	85.3404			Mv4-11	TAK901	93.0103
Molm13	Brigatinib	85.4211			Mv4-11	Amuvatinib(MP470)	93.026
Molm13	Fedratinib (SAR302503, TG101348)	85.4519			Mv4-11	SB-505124	93.0385
Molm13	K858	85.4653			Mv4-11	PIK75	93.0823
Molm13	URMC-099	85.4712			Mv4-11	Cyanoacetohydrazide	93.119
Molm13	Diosmetin	85.5093			Mv4-11	PIK75	93.1658
Molm13	HMN214	85.6146			Mv4-11	LY2090314	93.1879
Molm13	Fruquintinib	85.6789			Mv4-11	MLN1117	93.2467
Molm13	SC-514	85.9696			Mv4-11	Icotinib	93.2606
Molm13	Icotinib	85.9704			Mv4-11	TWS119	93.2833
Molm13	ETP46464	86.0161			Mv4-11	SB-431542	93.4047
Molm13	AG-213	86.0783			Mv4-11	PLX-3397	93.4916
Molm13	Emodin	86.1228			Mv4-11	Fedratinib (SAR302503, TG101348)	93.553
Molm13	SBE 13 hydrochloride	86.2089			Mv4-11	Leelamine	93.5762
Molm13	Kenpaullone	86.2283			Mv4-11	VE-821	93.588
Molm13	Chloropyramine hydrochloride	86.2378			Mv4-11	Y-27632 (hydrochloride)	93.6175
Molm13	D 4476	86.3282			Mv4-11	Decernotinib(VX-509)	93.6279
Molm13	KN-93	86.336			Mv4-11	Apigenin	93.6777
Molm13	GSK2578215A	86.4483			Mv4-11	Phenformin hydrochloride	93.6919
Molm13	SB590885	86.4621			Mv4-11	BX795	93.7151
Molm13	Losmapimod (GW856553X)	86.4676			Mv4-11	HS-173	93.731
Molm13	IM-12	86.4841			Mv4-11	MK1775	93.7747
Molm13	NU 7026	86.5017			Mv4-11	TH588	93.7871
Molm13	AS601245	86.5331			Mv4-11	PD 98059	93.843
Molm13	Momelotinib (CYT387)	86.5372			Mv4-11	AZD3759	93.8654
Molm13	SB1317	86.5642			Mv4-11	Bohemine	93.8757
Molm13	Metformin hydrochloride	86.5916			Mv4-11	Ruboxistaurin hydrochloride	93.9034
Molm13	VE-821	86.6335			Mv4-11	Curcumol	93.9226
Molm13	TDZD-8	86.6351			Mv4-11	VE-821	93.9309
Molm13	CAY10657	86.6516			Mv4-11	CZC-54252	93.9448
Molm13	AS-703026	86.7127			Mv4-11	BIBF 1120	93.9966
Molm13	CCT137690	86.8504			Mv4-11	Lupeol	94.0342
Molm13	PIK-75 (hydrochloride)	86.8733			Mv4-11	3PO	94.06
Molm13	Gˆ 6983	86.874			Mv4-11	GSK650394	94.1227
Molm13	Pyridone 6	86.8848			Mv4-11	Apitolisib (GDC-0980, RG7422)	94.1284
Molm13	SC-202671	86.9153			Mv4-11	Oclacitinib	94.1527
Molm13	VX-702	86.9672			Mv4-11	Amlexanox	94.1862
Molm13	SB1317	86.9689			Mv4-11	3-Methyladenine (3-MA)	94.1876
Molm13	JNK-IN-8	87.1254			Mv4-11	S-Ruxolitinib	94.2629
Molm13	Fedratinib (SAR302503, TG101348)	87.2414			Mv4-11	PF-06447475	94.2785
Molm13	CCT018159	87.2995			Mv4-11	Betaine hydrochloride	94.3685
Molm13	PD0325901	87.3039			Mv4-11	D-erythro-Sphingosine C-18	94.4211
Molm13	S49076	87.3406			Mv4-11	Mutant EGFR inhibitor	94.5289
Molm13	Phthalazinone pyrazole	87.4178			Mv4-11	THZ1	94.555
Molm13	L-threo-Sphingosine C-18	87.5807			Mv4-11	BGJ398 (NVP-BGJ398)	94.5778
Molm13	XL413	87.592			Mv4-11	ARRY380	94.6449
Molm13	AZD3463	87.7932			Mv4-11	CHIR-99021	94.6666
Molm13	CAY10567	87.796			Mv4-11	Sunitinib Malate	94.7826
Molm13	PLX647	87.8703			Mv4-11	Mollugin	94.7866
Molm13	Lauric Acid Leelamide	87.9169			Mv4-11	NVP-ADW742	94.8132
Molm13	AEE788	87.9588			Mv4-11	CaMKP Inhibitor	94.8177
Molm13	APY0201	87.9832			Mv4-11	GSK2606414	95.0579
Molm13	MK8745	88.0131			Mv4-11	SKF-86002	95.1465
Molm13	Verbascoside	88.1013			Mv4-11	R406	95.1865
Molm13	U0126-EtOH	88.1329			Mv4-11	Tofacitinib (CP-690550,Tasocitinib)	95.2541
Molm13	SB-216763	88.2616			Mv4-11	PD 0325901	95.2651
Molm13	SU11274	88.3439			Mv4-11	Verbascoside	95.3248
Molm13	SGI-1776 free base	88.4089			Mv4-11	WP1066	95.3465
Molm13	VX-745	88.439			Mv4-11	NVP 231	95.3535
Molm13	AZD7545	88.4582			Mv4-11	Bisindolylmaleimide IX (mesylate)	95.4431
Molm13	AG-490	88.5988			Mv4-11	3PO	95.4909
Molm13	Ibrutinib (PCI-32765)	88.7072			Mv4-11	AEE788	95.4992
Molm13	AG-1478	88.7315			Mv4-11	ETP46464	95.51
Molm13	SL-327	88.7577			Mv4-11	Vitamin E	95.5416
Molm13	GDC-0032	88.7585			Mv4-11	PD-173955	95.6277
Molm13	Gandotinib (LY2784544)	88.8029			Mv4-11	Obacunone	95.6632
Molm13	ENMD-2076	88.8907			Mv4-11	Lupeol	95.7505
Molm13	ZM 336372	88.8966			Mv4-11	AM-2394	95.7542
Molm13	BX795	88.921			Mv4-11	PD 169316	95.7716
Molm13	LY-2874455	89.0219			Mv4-11	Bay 11-7085	95.7862
Molm13	Loxiglumide	89.0259			Mv4-11	Lauric Acid Leelamide	95.8121
Molm13	1-NA-PP1	89.0608			Mv4-11	UNC2250	95.9321
Molm13	GNE9605	89.157			Mv4-11	CL-387785 (EKI-785)	95.9669
Molm13	KPT-330, (E)-RN	89.159			Mv4-11	THZ1	96.0955
Molm13	PLX-3397	89.1611			Mv4-11	KN-93	96.1855
Molm13	Gypenoside XVII	89.1748			Mv4-11	Lapatinib ditosylate monohydrate	96.1981
Molm13	Sphingosine Kinase Inhibitor 2	89.1777			Mv4-11	Leelamine (hydrochloride)	96.233
Molm13	Dimethylenastron	89.2009			Mv4-11	Scutellarein	96.262
Molm13	R788 (Fostamatinib) Disodium	89.2173			Mv4-11	Pseudolaric Acid B	96.2709
Molm13	SB202190 (FHPI)	89.2336			Mv4-11	CEP-33779	96.348
Molm13	PLX-3397	89.2519			Mv4-11	Coumarin	96.3739
Molm13	MK-8776 (SCH 900776)	89.2645			Mv4-11	BS-181	96.3825
Molm13	Amlexanox	89.2914			Mv4-11	Afatinib (BIBW2992) Dimaleate	96.4133
Molm13	AG-370	89.305			Mv4-11	Ibrutinib (PCI-32765)	96.4433
Molm13	CAY10576	89.3786			Mv4-11	TG003	96.4467
Molm13	NVP-BVU972	89.403			Mv4-11	PRT062607 (P505-15, BIIB057) hydrochloride	96.509
Molm13	AS-604850	89.4283			Mv4-11	Adenosine 5'-monophosphate monohydrate	96.5463
Molm13	Ribavirin	89.4289			Mv4-11	Miltefosine	96.5627
Molm13	SAR245409 (XL765)	89.494			Mv4-11	CAY10577	96.6254
Molm13	AG-1517;PD153035	89.4956			Mv4-11	BAY 11-7082	96.6382
Molm13	Masitinib (AB1010)	89.5884			Mv4-11	MK1775	96.6855
Molm13	KenPaullone	89.6173			Mv4-11	Leelamine (hydrochloride)	96.6899
Molm13	KN-93	89.6628			Mv4-11	LY2835219	96.7334
Molm13	K 02288	89.6804			Mv4-11	Motesanib Diphosphate (AMG-706)	96.7801
Molm13	AZD4547	89.6914			Mv4-11	TGX-221	96.8222
Molm13	KN-62	89.781			Mv4-11	Tyrphostin 9	96.8441
Molm13	Fangchinoline	89.7872			Mv4-11	TBB(NSC 231634)	96.8898
Molm13	Kenpaullone	89.8103			Mv4-11	Apigenin	96.9399
Molm13	WHI-P258	90.0382			Mv4-11	PD 169316	96.9407
Molm13	Miltefosine	90.0642			Mv4-11	Leflunomide	97.0133
Molm13	BI-D1870	90.0708			Mv4-11	SC-514	97.0393
Molm13	AG-18	90.0742			Mv4-11	FLT3-IN-1	97.0726
Molm13	Fasudil (HA-1077) hydrochloride	90.1768			Mv4-11	Defactinib (VS-6063, PF-04554878)	97.1079
Molm13	Cediranib (AZD2171)	90.2142			Mv4-11	AZ 960	97.1123
Molm13	BAW2881	90.2246			Mv4-11	Valproic Acid (sodium salt)	97.1381
Molm13	AS-605240 (potassium salt)	90.2635			Mv4-11	Emodin	97.2063
Molm13	UNC2250	90.2867			Mv4-11	AG-825	97.2165
Molm13	BKM120 (NVP-BKM120, Buparlisib)	90.321			Mv4-11	Radotinib	97.2352
Molm13	RG-13022	90.3525			Mv4-11	KPT-330, (E)-RN	97.2814
Molm13	ENMD-2076	90.3765			Mv4-11	Nilotinib	97.2976
Molm13	Semaxanib (SU5416)	90.3998			Mv4-11	Dinaciclib (SCH727965)	97.3103
Molm13	TAE226 (NVP-TAE226)	90.4143			Mv4-11	XMD8-92	97.3272
Molm13	BS-181	90.4763			Mv4-11	Doramapimod	97.3277
Molm13	Sodium†Dichloroacetate	90.6038			Mv4-11	TBB(NSC 231634)	97.3409
Molm13	Dasatinib	90.617			Mv4-11	ZM306416	97.362
Molm13	Filgotinib (GLPG0634)	90.6644			Mv4-11	KN-93 Phosphate	97.3737
Molm13	Asiatic acid	90.6727			Mv4-11	WHI-P131	97.3919
Molm13	TAE226 (NVP-TAE226)	90.6803			Mv4-11	Danusertib (PHA-739358)	97.4043
Molm13	Leelamine	90.7226			Mv4-11	SU11274	97.4124
Molm13	Adenosine 5'-monophosphate	90.7451			Mv4-11	Purvalanol A	97.4796
Molm13	Verbascoside	90.764			Mv4-11	AZD3463	97.4955
Molm13	VX-745	90.7851			Mv4-11	Gypenoside XVII	97.4961
Molm13	SSR128129E	90.8311			Mv4-11	6-BIO	97.5061
Molm13	Imatinib (STI571)	90.8402			Mv4-11	ZM 336372	97.5764
Molm13	ZM 336372	90.8568			Mv4-11	Fasudil	97.5799
Molm13	17?-hydroxy Wortmannin	90.8644			Mv4-11	JNJ-10198409	97.5917
Molm13	Bikinin	90.8917			Mv4-11	Masitinib (AB1010)	97.6431
Molm13	D 4476	90.9147			Mv4-11	SP 600125	97.6462
Molm13	Phenylindione	91.011			Mv4-11	Neratinib(HKI-272)	97.6534
Molm13	B-Raf inhibitor 1	91.0275			Mv4-11	PIK-75 (hydrochloride)	97.6634
Molm13	Irbinitinib(ARRY-380; ONT-380)	91.1475			Mv4-11	GSK-2636771	97.6792
Molm13	Semaxinib(SU 5416)	91.1557			Mv4-11	AG-1517;PD153035	97.7028
Molm13	AG-1478	91.1651			Mv4-11	Erlotinib	97.7168
Molm13	Glabridin	91.2492			Mv4-11	CCT137690	97.7171
Molm13	Psoralidin	91.2492			Mv4-11	IRAK-1/4 Inhibitor	97.7176
Molm13	BML-275	91.2605			Mv4-11	BKM120 (NVP-BKM120, Buparlisib)	97.7614
Molm13	Ro-3306	91.3683			Mv4-11	Briciclib	97.7989
Molm13	PD0325901	91.4033			Mv4-11	kb-NB77-78	97.8087
Molm13	AZD5438	91.4321			Mv4-11	MPI-0479605	97.8219
Molm13	Motesanib (AMG-706)	91.4473			Mv4-11	SU 6668	97.8344
Molm13	BML-277	91.5741			Mv4-11	PF 573228	97.8457
Molm13	Neratinib(HKI-272)	91.6873			Mv4-11	ML167	97.8649
Molm13	TG003	91.7202			Mv4-11	Flavopiridol (Alvocidib) hydrochloride	97.8767
Molm13	MK-2206 dihydrochloride	91.7322			Mv4-11	Glabridin	97.9064
Molm13	AG-18	91.7578			Mv4-11	CVT-313	97.914
Molm13	ZM 39923 hydrochloride	91.8412			Mv4-11	CAY10505	97.9176
Molm13	Chrysophanic Acid	91.8792			Mv4-11	GSK650394	97.9211
Molm13	A 769662	91.935			Mv4-11	Forsythin	97.9346
Molm13	Tofacitinib (CP-690550) Citrate	91.967			Mv4-11	Alectinib	97.9466
Molm13	Myricetin	91.9752			Mv4-11	Adenosine 5'-monophosphate monohydrate	97.951
Molm13	5-Iodotubercidin	92.0027			Mv4-11	ENMD-2076	97.9737
Molm13	Fangchinoline	92.0103			Mv4-11	BEZ235 (NVP-BEZ235, Dactolisib)	97.9952
Molm13	Tivozanib (AV-951)	92.0366			Mv4-11	Momelotinib (CYT387)	97.9967
Molm13	Curcumol	92.1501			Mv4-11	Gˆ 6983	97.9978
Molm13	LY2228820	92.183			Mv4-11	LY-364947	97.9993
Molm13	TSU-68 (SU6668, Orantinib)	92.1932			Mv4-11	Warfarin	98.0421
Molm13	Bohemine	92.2703			Mv4-11	Canertinib (hydrochloride)	98.043
Molm13	Lapatinib	92.3148			Mv4-11	TGX-221	98.0544
Molm13	PD 169316	92.3503			Mv4-11	PI-103	98.0711
Molm13	Janex 1	92.405			Mv4-11	AZD4547	98.0939
Molm13	AS 602801	92.4147			Mv4-11	SP600125	98.17
Molm13	Entrectinib	92.4517			Mv4-11	IM-12	98.2243
Molm13	Piceatannol	92.4884			Mv4-11	Bisindolylmaleimide IV	98.2622
Molm13	Vitamin E	92.4998			Mv4-11	NVP-ADW742	98.2736
Molm13	VX-702	92.5011			Mv4-11	AG-1478	98.3823
Molm13	LY294002	92.5209			Mv4-11	SB590885	98.4386
Molm13	GW441756	92.5287			Mv4-11	Corosolic acid	98.4525
Molm13	PI-103	92.5583			Mv4-11	Mubritinib (TAK 165)	98.4756
Molm13	Sennoside B	92.5849			Mv4-11	KI8751	98.4781
Molm13	CHIR-99021	92.5921			Mv4-11	PF06463922	98.4862
Molm13	SRPIN340	92.6127			Mv4-11	Bikinin	98.5551
Molm13	Afatinib (BIBW2992)	92.7034			Mv4-11	Chloropyramine hydrochloride	98.5582
Molm13	Picropodophyllin (PPP)	92.708			Mv4-11	Triciribine	98.5626
Molm13	Fasudil (HA-1077) hydrochloride	92.7615			Mv4-11	Bisindolylmaleimide I	98.5783
Molm13	XL147 analogue	92.7911			Mv4-11	GSK2334470	98.6696
Molm13	Arachidonic Acid Leelamide	92.8186			Mv4-11	Ro 31-8220 Mesylate	98.6703
Molm13	PD 98059	92.84			Mv4-11	(S)-H-1152 (hydrochloride)	98.6802
Molm13	Dimethylenastron	92.8463			Mv4-11	Baricitinib (LY3009104, INCB028050)	98.6985
Molm13	Valproic Acid (sodium salt)	92.8543			Mv4-11	NVP-BEZ235	98.7164
Molm13	Y-27632 (hydrochloride)	92.9275			Mv4-11	XL019	98.7194
Molm13	PF-06447475	92.988			Mv4-11	ZM 336372	98.7323
Molm13	Betaine hydrochloride	93.0815			Mv4-11	Doramapimod	98.8482
Molm13	TG100-115	93.1535			Mv4-11	SBI-0206965	98.8686
Molm13	Sunitinib	93.1729			Mv4-11	CHIR99021	98.9347
Molm13	N,N-Dimethylsphingosine	93.2089			Mv4-11	Icotinib Hydrochloride	98.9475
Molm13	5-Iodotubercidin	93.2927			Mv4-11	DB07268	98.9646
Molm13	KPT-330, (E)-RN	93.325			Mv4-11	WHI-P258	98.9863
Molm13	TAS-301	93.3779			Mv4-11	PIK-294	99.0004
Molm13	Selumetinib (AZD6244)	93.3855			Mv4-11	Dasatinib monohydrate	99.0268
Molm13	PIK-294	93.3875			Mv4-11	PHT-427	99.0641
Molm13	HS-173	93.4113			Mv4-11	PD 98059	99.0675
Molm13	R112	93.4473			Mv4-11	PF-562271	99.0699
Molm13	RN486	93.4819			Mv4-11	ID-8	99.0708
Molm13	(R)-Ruxolitinib (INCB018424)	93.4931			Mv4-11	AZD-9291 mesylate	99.1253
Molm13	ARRY380	93.5302			Mv4-11	TAS-301	99.1617
Molm13	KenPaullone	93.5327			Mv4-11	LY2409881 trihydrochloride	99.1672
Molm13	PND-1186	93.5382			Mv4-11	VX-702	99.1934
Molm13	Lupeol	93.5792			Mv4-11	AKT inhibitor VIII	99.2145
Molm13	SB-431542	93.6436			Mv4-11	NU7026	99.2321
Molm13	CGP 57380	93.6661			Mv4-11	SB202190 (FHPI)	99.2781
Molm13	PIK-90	93.6865			Mv4-11	Chrysophanic Acid	99.3231
Molm13	Dabrafenib (GSK2118436)	93.7021			Mv4-11	Y-27632 dihydrochloride	99.5476
Molm13	ASP 3026	93.7527			Mv4-11	U0126-EtOH	99.5817
Molm13	Gefitinib (ZD1839)	93.7744			Mv4-11	NU 6102	99.598
Molm13	LY2603618	93.7879			Mv4-11	KPT-330, (E)-RN	99.6098
Molm13	PF 431396	93.7946			Mv4-11	CAY10571	99.6225
Molm13	Amuvatinib(MP470)	93.82			Mv4-11	GSK2334470	99.6288
Molm13	CAY10505	93.8422			Mv4-11	Asiatic acid	99.6344
Molm13	AS-041164	93.8959			Mv4-11	URMC-099	99.6555
Molm13	SU 6668	93.9134			Mv4-11	AZD2858	99.6681
Molm13	Triciribine	93.9818			Mv4-11	D 4476	99.7166
Molm13	Vitamin E	94.0318			Mv4-11	Cediranib (AZD2171)	99.7737
Molm13	Bikinin	94.0643			Mv4-11	Notoginsenoside R1	99.7755
Molm13	YM201636	94.0769			Mv4-11	Pyridoxine	99.8687
Molm13	HTH-01-015	94.0897			Mv4-11	SKLB 610	99.8791
Molm13	CZC-25146	94.1111			Mv4-11	GNE 477	99.8815
Molm13	PD 173074	94.2518			Mv4-11	LY2228820	99.9098
Molm13	Chrysophanic Acid	94.2663			Mv4-11	AG-99	99.9158
Molm13	NVP-ADW742	94.2928			Mv4-11	Go 6983	99.9358
Molm13	Ro3280	94.3146			Mv4-11	CAY10576	99.9528
Molm13	FR180204	94.3446			Mv4-11	TH588	100.061
Molm13	PKC-412(Midostaurin)	94.3811			Mv4-11	TG003	100.064
Molm13	2,3-Butanedione 2-Monoxime	94.3992			Mv4-11	Ginsenoside Rg2	100.08
Molm13	UNC0064-12	94.4883			Mv4-11	AZ20	100.115
Molm13	2-Methoxy-1,4-naphthoquinone	94.5831			Mv4-11	CAY10574	100.126
Molm13	AZD9291	94.59			Mv4-11	Glabridin	100.16
Molm13	NSC 663284	94.6251			Mv4-11	Tunicamycin	100.168
Molm13	PP242	94.6723			Mv4-11	LY294002	100.198
Molm13	Y-27632 (hydrochloride)	94.6759			Mv4-11	XMD8-92	100.218
Molm13	Gliclazide	94.6894			Mv4-11	AG-490	100.218
Molm13	2-Methoxy-1,4-naphthoquinone	94.7442			Mv4-11	ARRY380	100.27
Molm13	R788 (Fostamatinib) Disodium	94.7795			Mv4-11	Duvelisib (IPI-145, INK1197)	100.307
Molm13	AMG-337	94.7899			Mv4-11	AZD2858	100.342
Molm13	DCC-2036 (Rebastinib)	94.8575			Mv4-11	NSC 42834	100.387
Molm13	AKT inhibitor VIII	94.8777			Mv4-11	PIK-90	100.397
Molm13	Corosolic acid	94.8887			Mv4-11	VX-11e	100.414
Molm13	Olomoucine	94.9002			Mv4-11	GSK-1059615	100.417
Molm13	XMD8-92	94.9063			Mv4-11	Necrostatin-1	100.448
Molm13	UNC0064-12	94.9234			Mv4-11	Curcumol	100.471
Molm13	ANA-12	94.9289			Mv4-11	Carbazochrome	100.501
Molm13	3PO	94.9336			Mv4-11	Necrostatin-5	100.52
Molm13	PD 0325901	94.9383			Mv4-11	AG-1517;PD153035	100.524
Molm13	Bosutinib	94.9402			Mv4-11	RN486	100.562
Molm13	NSC 210902	94.9439			Mv4-11	LRRK2-IN-1	100.609
Molm13	A66	94.9602			Mv4-11	CAY10505	100.63
Molm13	Erlotinib	94.9718			Mv4-11	CAL-101 (Idelalisib, GS-1101)	100.637
Molm13	GNF-2	95.0189			Mv4-11	CEP-32496	100.64
Molm13	MLN8237(Alisertib)	95.0542			Mv4-11	Nilotinib (AMN-107)	100.661
Molm13	GNE 477	95.0665			Mv4-11	LY294002	100.71
Molm13	Ruboxistaurin hydrochloride	95.1456			Mv4-11	Bisindolylmaleimide VIII (acetate)	100.731
Molm13	ML347	95.1486			Mv4-11	JNK-IN-7	100.748
Molm13	CC-292 (AVL-292)	95.1492			Mv4-11	Pazopanib	100.767
Molm13	Crizotinib (PF-02341066)	95.178			Mv4-11	Sunitinib Malate	100.767
Molm13	Tunicamycin	95.2551			Mv4-11	Fasudil (HA-1077) hydrochloride	100.777
Molm13	HA-1077 (hydrochloride)	95.2628			Mv4-11	GNF-2	100.828
Molm13	TDZD-8	95.2629			Mv4-11	Piceatannol	100.874
Molm13	TSU-68 (SU6668, Orantinib)	95.4807			Mv4-11	Pyridone 6	100.885
Molm13	PP2	95.6078			Mv4-11	CAY10571	100.908
Molm13	D 4476	95.6304			Mv4-11	AZD4547	100.952
Molm13	Pelitinib (EKB-569)	95.6451			Mv4-11	Emodin	100.952
Molm13	PI-103	95.663			Mv4-11	Daphnetin	100.965
Molm13	U-0126	95.6691			Mv4-11	BAY 11-7082	101.027
Molm13	Saracatinib (AZD0530)	95.7			Mv4-11	Imatinib Mesylate (STI571)	101.074
Molm13	PKC-412(Midostaurin)	95.7036			Mv4-11	SGX-523	101.08
Molm13	PF-477736	95.7415			Mv4-11	MK-8776 (SCH 900776)	101.094
Molm13	PH797804	95.7526			Mv4-11	SB-216763	101.103
Molm13	MK-8776 (SCH 900776)	95.7869			Mv4-11	Bikinin	101.167
Molm13	PIK-inhibitors	95.8013			Mv4-11	ISRIB	101.188
Molm13	Doramapimod	95.8195			Mv4-11	BX795	101.192
Molm13	Doramapimod	95.9342			Mv4-11	Ro-3306	101.2
Molm13	DMH1	95.9546			Mv4-11	SKF-86002	101.22
Molm13	XL147 analogue	95.9923			Mv4-11	NSC 210902	101.243
Molm13	Bisindolylmaleimide IX (mesylate)	96.0045			Mv4-11	AG-490	101.248
Molm13	SGI-1776 free base	96.1301			Mv4-11	Diosmetin	101.278
Molm13	PIK75	96.1599			Mv4-11	PD 166326	101.292
Molm13	Motesanib Diphosphate (AMG-706)	96.1658			Mv4-11	Sotrastaurin	101.312
Molm13	XL019	96.2087			Mv4-11	TGX-221	101.319
Molm13	Vemurafenib (PLX4032, RG7204)	96.2146			Mv4-11	K 02288	101.427
Molm13	Regorafenib (BAY 73-4506)	96.2496			Mv4-11	7,8-Dihydroxyflavone	101.479
Molm13	KI8751	96.2592			Mv4-11	PD 169316	101.542
Molm13	Semaxinib(SU 5416)	96.2962			Mv4-11	BMS-265246	101.593
Molm13	PF-562271	96.335			Mv4-11	Icotinib	101.641
Molm13	ZM 336372	96.3581			Mv4-11	AS 602801	101.65
Molm13	Purvalanol A	96.3593			Mv4-11	FR180204	101.668
Molm13	Imatinib Mesylate (STI571)	96.3722			Mv4-11	VX-702	101.682
Molm13	Emodin	96.3779			Mv4-11	CID755673	101.689
Molm13	Bay 11-7085	96.4362			Mv4-11	CNX-774	101.692
Molm13	Momordin Ic	96.4533			Mv4-11	SB216763	101.695
Molm13	IQ-1S	96.4802			Mv4-11	Lapatinib (GW-572016) Ditosylate	101.695
Molm13	DCC-2036 (Rebastinib)	96.5131			Mv4-11	RPI-1	101.712
Molm13	BLU9931	96.5311			Mv4-11	WHI-P154	101.732
Molm13	Briciclib	96.5689			Mv4-11	AZ 960	101.742
Molm13	AG-213	96.5827			Mv4-11	KN-93	101.758
Molm13	CGI1746	96.5894			Mv4-11	BKM120 (NVP-BKM120, Buparlisib)	101.759
Molm13	FR180204	96.6158			Mv4-11	CL-387785 (EKI-785)	101.83
Molm13	AG-99	96.6185			Mv4-11	GNE7915	101.833
Molm13	RKI-1447	96.6571			Mv4-11	CH5183284 (Debio-1347)	101.843
Molm13	AG-1478	96.687			Mv4-11	ML347	101.856
Molm13	GSK923295	96.776			Mv4-11	Defactinib (VS-6063, PF-04554878)	101.869
Molm13	7,8-Dihydroxyflavone	96.7969			Mv4-11	PHT-427	101.869
Molm13	TAS-301	96.8114			Mv4-11	Tofacitinib (CP-690550) Citrate	101.93
Molm13	KRCA-0008	96.8319			Mv4-11	Pilaralisib (XL147)	101.974
Molm13	TAK632	96.8563			Mv4-11	DCC-2036 (Rebastinib)	101.976
Molm13	Cobimetinib	96.862			Mv4-11	Bisindolylmaleimide IV	101.982
Molm13	Mollugin	96.8662			Mv4-11	Honokiol	101.988
Molm13	JNK-IN-8	96.914			Mv4-11	Saracatinib (AZD0530)	101.991
Molm13	LY2835219	96.9459			Mv4-11	Momordin Ic	101.998
Molm13	Indirubin-3'-monoxime	96.9598			Mv4-11	ANA-12	102.021
Molm13	Alectinib	96.9734			Mv4-11	Alectinib	102.021
Molm13	Icotinib Hydrochloride	97.0014			Mv4-11	KN-92 (hydrochloride)	102.026
Molm13	MLN1117	97.0073			Mv4-11	L-779,450	102.034
Molm13	(S)-H-1152 (hydrochloride)	97.0212			Mv4-11	Bay 11-7085	102.051
Molm13	BKM120 (NVP-BKM120, Buparlisib)	97.0402			Mv4-11	Pelitinib (EKB-569)	102.057
Molm13	Erlotinib	97.0455			Mv4-11	Brivanib Alaninate (BMS-582664)	102.074
Molm13	Daphnetin	97.0889			Mv4-11	AZ20	102.079
Molm13	3-Methyladenine (3-MA)	97.0896			Mv4-11	IQ-1S	102.14
Molm13	VX-702	97.1203			Mv4-11	Penciclovir	102.198
Molm13	H-9 (hydrochloride)	97.1329			Mv4-11	PD184352 (CI-1040)	102.206
Molm13	PRT062607 (P505-15, BIIB057) hydrochloride	97.2024			Mv4-11	NU7441 (KU-57788)	102.22
Molm13	HTH-01-015	97.2051			Mv4-11	Lavendustin C	102.225
Molm13	LRRK2-IN-1	97.2124			Mv4-11	Pimasertib (AS-703026)	102.246
Molm13	AG-1517;PD153035	97.2379			Mv4-11	Myricetin	102.278
Molm13	CVT-313	97.2532			Mv4-11	Ribavirin	102.318
Molm13	NG-52	97.3037			Mv4-11	RG-13022	102.338
Molm13	CNX-774	97.3209			Mv4-11	Sphingosine Kinase Inhibitor 2	102.342
Molm13	S49076	97.3287			Mv4-11	BIX02189	102.353
Molm13	RPI-1	97.4221			Mv4-11	CAY10626	102.365
Molm13	YM-201636	97.4413			Mv4-11	AG-213	102.368
Molm13	PD 0325901	97.4434			Mv4-11	AZD1080	102.369
Molm13	Bardoxolone Methyl	97.4646			Mv4-11	LDN212854	102.407
Molm13	CL-387785 (EKI-785)	97.4908			Mv4-11	Flavopiridol (Alvocidib) hydrochloride	102.47
Molm13	Lapatinib (GW-572016) Ditosylate	97.5162			Mv4-11	HUHS015	102.483
Molm13	KN-93 Phosphate	97.5292			Mv4-11	LY-2874455	102.489
Molm13	CHIR98014	97.5578			Mv4-11	Afatinib (BIBW2992)	102.554
Molm13	GW2580	97.5624			Mv4-11	AS-252424	102.555
Molm13	Decernotinib(VX-509)	97.6581			Mv4-11	Sennoside B	102.583
Molm13	Losmapimod (GW856553X)	97.7155			Mv4-11	H-8 (hydrochloride)	102.592
Molm13	Altiratinib(DCC2701)	97.7834			Mv4-11	Tyrphostin 9	102.641
Molm13	BGJ398 (NVP-BGJ398)	97.8028			Mv4-11	SB 203580	102.658
Molm13	LRRK2-IN-1	97.8238			Mv4-11	Methyl hesperidin	102.671
Molm13	Proglumide	97.8707			Mv4-11	WHI-P180	102.681
Molm13	GSK1838705A	97.881			Mv4-11	SB 203580 (hydrochloride)	102.69
Molm13	LY2835219 mesylate	97.883			Mv4-11	YM-201636	102.695
Molm13	INK128	97.8951			Mv4-11	AG-494	102.708
Molm13	Lidocaine Hydrochloride hydrate	97.9289			Mv4-11	Torin 1	102.717
Molm13	AZD-9291 mesylate	97.9579			Mv4-11	RG-14620	102.723
Molm13	PF 573228	97.9695			Mv4-11	Danusertib (PHA-739358)	102.741
Molm13	LDC1267	97.9788			Mv4-11	LY2603618	102.794
Molm13	3PO	97.9952			Mv4-11	AG-18	102.826
Molm13	CAY10577	98.0208			Mv4-11	GNE7915	102.834
Molm13	Lauric Acid Leelamide	98.0255			Mv4-11	D-erythro-Sphingosine C-18	102.837
Molm13	PLX4720	98.0662			Mv4-11	Neratinib(HKI-272)	102.847
Molm13	VX-702	98.0763			Mv4-11	Bosutinib	102.947
Molm13	AS-041164	98.0967			Mv4-11	D 4476	102.954
Molm13	GSK-2256098	98.1278			Mv4-11	Bisindolylmaleimide XI (hydrochloride)	102.956
Molm13	PIK75	98.1354			Mv4-11	(S)-H-1152 (hydrochloride)	102.961
Molm13	Ruxolitinib	98.1482			Mv4-11	Cobimetinib	102.964
Molm13	Radotinib	98.2343			Mv4-11	Kaempferitrin	103.02
Molm13	AG-1296	98.2464			Mv4-11	CGP 57380	103.059
Molm13	AZ5104	98.2548			Mv4-11	DRB	103.089
Molm13	H-8 (hydrochloride)	98.282			Mv4-11	MLN0905	103.146
Molm13	SB 203580	98.3169			Mv4-11	Pimasertib (AS-703026)	103.167
Molm13	IRAK-1/4 Inhibitor	98.3431			Mv4-11	Lapatinib	103.186
Molm13	GDC-0941	98.3436			Mv4-11	Fostamatinib (R788)	103.201
Molm13	CUDC-101	98.3594			Mv4-11	VX-745	103.217
Molm13	MLN0905	98.3618			Mv4-11	WP1066	103.265
Molm13	NU2058	98.3769			Mv4-11	LDK378(Ceritinib)	103.268
Molm13	SC-514	98.3874			Mv4-11	AG-370	103.268
Molm13	Bohemine	98.4128			Mv4-11	1-NA-PP1	103.269
Molm13	Dasatinib monohydrate	98.4201			Mv4-11	RPI-1	103.279
Molm13	GNF-5	98.5007			Mv4-11	Motesanib (AMG-706)	103.297
Molm13	CAY10571	98.5049			Mv4-11	AS-605240	103.3
Molm13	Necrostatin-1	98.5194			Mv4-11	GSK2578215A	103.351
Molm13	Asiaticoside	98.5231			Mv4-11	1NM-PP1	103.422
Molm13	IC-87114	98.5301			Mv4-11	DMH1	103.431
Molm13	LY2835219 mesylate	98.5601			Mv4-11	R788 (Fostamatinib) Disodium	103.442
Molm13	(R)-Roscovitine	98.5803			Mv4-11	CGK 733	103.476
Molm13	Bisindolylmaleimide VIII (acetate)	98.59			Mv4-11	Olomoucine	103.487
Molm13	GSK-2636771	98.6295			Mv4-11	A66	103.495
Molm13	Canertinib dihydrochloride	98.632			Mv4-11	PD0325901	103.504
Molm13	Chelerythrine (chloride)	98.6589			Mv4-11	Semaxinib(SU 5416)	103.509
Molm13	AG-490 (Tyrphostin B42)	98.7618			Mv4-11	CCT018159	103.51
Molm13	Myricetrin	98.8575			Mv4-11	GSK2656157	103.512
Molm13	UNC2250	98.8824			Mv4-11	GNF-7	103.532
Molm13	PF 573228	98.9183			Mv4-11	Ruxolitinib (INCB-18424) phosphate	103.562
Molm13	GNF-5	98.933			Mv4-11	Bardoxolone Methyl	103.61
Molm13	Necrostatin-5	98.9442			Mv4-11	INCB28060(Capmatinib)	103.617
Molm13	RPI-1	98.9581			Mv4-11	Losmapimod (GW856553X)	103.653
Molm13	UNC2881	99.0204			Mv4-11	BMS 599626	103.664
Molm13	Pseudolaric Acid B	99.0247			Mv4-11	Cobimetinib	103.668
Molm13	IC261	99.0253			Mv4-11	FRAX597	103.668
Molm13	PP2	99.0368			Mv4-11	Imatinib (STI571)	103.676
Molm13	MRT67307	99.0447			Mv4-11	Lapatinib	103.73
Molm13	A66	99.0649			Mv4-11	RG-13022	103.733
Molm13	Palbociclib (PD0332991) Isethionate	99.093			Mv4-11	AG-370	103.775
Molm13	AP26113	99.1242			Mv4-11	AZ 3146	103.803
Molm13	MK-2206 dihydrochloride	99.1342			Mv4-11	A 769662	103.887
Molm13	Mollugin	99.2039			Mv4-11	Vemurafenib (PLX4032, RG7204)	103.912
Molm13	kb-NB77-78	99.2274			Mv4-11	UNC2250	103.921
Molm13	BAW2881	99.2362			Mv4-11	Tivozanib (AV-951)	103.94
Molm13	SKI II	99.2542			Mv4-11	AZD7545	103.947
Molm13	Palbociclib	99.276			Mv4-11	Scutellarein	103.957
Molm13	CAY10578	99.3044			Mv4-11	LEE011	103.965
Molm13	CAY10622	99.313			Mv4-11	AR-A014418	103.98
Molm13	ASP 3026	99.3173			Mv4-11	Piceatannol	103.98
Molm13	Imatinib (mesylate)	99.4006			Mv4-11	PF 573228	103.995
Molm13	Fostamatinib (R788)	99.4546			Mv4-11	LDN212854	104.04
Molm13	3-Methyladenine (3-MA)	99.4587			Mv4-11	ML347	104.046
Molm13	KN-62	99.4588			Mv4-11	Tofacitinib (CP-690550,Tasocitinib)	104.051
Molm13	CAY10505	99.4911			Mv4-11	HTH-01-015	104.07
Molm13	PF-562271	99.6183			Mv4-11	S49076	104.08
Molm13	Decernotinib(VX-509)	99.6338			Mv4-11	S-Ruxolitinib	104.089
Molm13	BML-275	99.7117			Mv4-11	SB590885	104.096
Molm13	Y-27632 dihydrochloride	99.7214			Mv4-11	AG-490 (Tyrphostin B42)	104.099
Molm13	BMS 599626	99.7395			Mv4-11	CZC24832	104.107
Molm13	AZD8931 (Sapitinib)	99.7782			Mv4-11	Selumetinib (AZD6244)	104.11
Molm13	SB-505124	99.797			Mv4-11	ST638	104.129
Molm13	TGX-221	99.8169			Mv4-11	Fruquintinib	104.148
Molm13	Go 6983	99.8399			Mv4-11	SL-327	104.16
Molm13	H-89 (hydrochloride)	99.8513			Mv4-11	ANA-12	104.162
Molm13	Baricitinib (LY3009104, INCB028050)	99.8796			Mv4-11	R406 free base	104.174
Molm13	Fostamatinib (R788)	99.941			Mv4-11	LFM-A13	104.191
Molm13	Fasudil	99.9719			Mv4-11	CAY10561	104.193
Molm13	Pimasertib (AS-703026)	99.9809			Mv4-11	GNF-5	104.234
Molm13	NU7026	99.9969			Mv4-11	Piceatannol	104.258
Molm13	KI8751	100.02			Mv4-11	R406	104.261
Molm13	AT 7519 hydrochloride salt	100.051			Mv4-11	GSK-2256098	104.269
Molm13	MLN1117	100.092			Mv4-11	HTH-01-015	104.271
Molm13	Vandetanib (ZD6474)	100.109			Mv4-11	LDK378(Ceritinib)	104.287
Molm13	PH797804	100.128			Mv4-11	Ro 31-8220 Mesylate	104.39
Molm13	TWS119	100.13			Mv4-11	WH-4-023	104.399
Molm13	CAY10621	100.149			Mv4-11	PKC-412(Midostaurin)	104.4
Molm13	SKI II	100.207			Mv4-11	LDN-214117	104.409
Molm13	TG100-115	100.21			Mv4-11	AZ 3146	104.441
Molm13	PD-173955	100.259			Mv4-11	PI3-Kinase ? Inhibitor 2	104.459
Molm13	SB 203580 (hydrochloride)	100.274			Mv4-11	ZM 336372	104.517
Molm13	DRB	100.302			Mv4-11	PIK-90	104.528
Molm13	Warfarin sodium	100.307			Mv4-11	KN-62	104.558
Molm13	Phenylindione	100.35			Mv4-11	CAY10578	104.658
Molm13	SCH772984	100.381			Mv4-11	KN-93 Phosphate	104.667
Molm13	Rociletinib (CO-1686, AVL-301)	100.417			Mv4-11	GNE9605	104.68
Molm13	KU55933	100.438			Mv4-11	SBE 13 hydrochloride	104.684
Molm13	Icotinib	100.443			Mv4-11	SB 202190	104.725
Molm13	GDC-0032	100.445			Mv4-11	Necrostatin-5	104.742
Molm13	THZ1	100.462			Mv4-11	MLN8054	104.752
Molm13	L-threo-Sphingosine C-18	100.5			Mv4-11	CGK 733	104.774
Molm13	Methyl hesperidin	100.549			Mv4-11	KW2449	104.801
Molm13	AG-17	100.574			Mv4-11	H-89 (hydrochloride)	104.804
Molm13	Apigenin	100.592			Mv4-11	AICAR (Acadesine)	104.825
Molm13	Saracatinib (AZD0530)	100.604			Mv4-11	XL413	104.869
Molm13	CHIR99021	100.613			Mv4-11	Lavendustin C	104.875
Molm13	Tivozanib (AV-951)	100.644			Mv4-11	ABT-869	104.88
Molm13	Genistein	100.652			Mv4-11	CDK4-IN-1	104.882
Molm13	PF-477736	100.658			Mv4-11	Streptozocin	104.892
Molm13	KN-93 Phosphate	100.663			Mv4-11	GW441756	104.9
Molm13	Lapatinib	100.702			Mv4-11	YM201636	104.937
Molm13	KW2449	100.708			Mv4-11	PI3K-IN-2	104.941
Molm13	PD 169316	100.712			Mv4-11	Olomoucine	104.943
Molm13	Phthalazinone pyrazole	100.719			Mv4-11	Sodium houttuyfonate	104.968
Molm13	Honokiol	100.741			Mv4-11	AG-183	105.015
Molm13	Torin 1	100.745			Mv4-11	2-Methoxy-1,4-naphthoquinone	105.058
Molm13	Notoginsenoside R1	100.767			Mv4-11	SKLB1002	105.093
Molm13	NU7026	100.771			Mv4-11	Genistein	105.097
Molm13	Afatinib (BIBW2992) Dimaleate	100.796			Mv4-11	(S)-Glycyl-H-1152 (hydrochloride)	105.097
Molm13	LFM-A13	100.871			Mv4-11	UNC0064-12	105.101
Molm13	Erlotinib hydrochloride	100.94			Mv4-11	Penciclovir	105.112
Molm13	Ddr1-In-1	100.986			Mv4-11	Bardoxolone Methyl	105.12
Molm13	Mubritinib (TAK 165)	100.999			Mv4-11	OSI 930	105.157
Molm13	FRAX597	101.016			Mv4-11	Imatinib (mesylate)	105.179
Molm13	R406 free base	101.022			Mv4-11	SKI II	105.193
Molm13	SB216763	101.027			Mv4-11	Nocodazole	105.225
Molm13	AG-494	101.031			Mv4-11	TGX-221	105.238
Molm13	CZC-54252	101.031			Mv4-11	Palbociclib (PD-0332991) hydrochloride	105.278
Molm13	PIK-93	101.035			Mv4-11	SKI II	105.288
Molm13	Ruxolitinib (INCB-18424) phosphate	101.036			Mv4-11	CAY10554	105.294
Molm13	Tofacitinib (CP-690550,Tasocitinib)	101.043			Mv4-11	AM-2394	105.364
Molm13	AM-2394	101.045			Mv4-11	Trametinib (GSK1120212)	105.367
Molm13	GLPG0634 analogue	101.089			Mv4-11	TAE226 (NVP-TAE226)	105.368
Molm13	ETP46464	101.128			Mv4-11	SC66	105.376
Molm13	Bisindolylmaleimide IV	101.147			Mv4-11	PP2	105.388
Molm13	AZ 3146	101.206			Mv4-11	ID-8	105.43
Molm13	Dacomitinib (PF299804, PF299)	101.235			Mv4-11	AG18	105.493
Molm13	Nilotinib (AMN-107)	101.253			Mv4-11	Vemurafenib (PLX4032, RG7204)	105.499
Molm13	Diosmetin	101.277			Mv4-11	Tunicamycin	105.525
Molm13	Defactinib (VS-6063, PF-04554878)	101.297			Mv4-11	GSK-1059615	105.544
Molm13	Adenosine 5'-monophosphate	101.331			Mv4-11	BIBF 1120	105.559
Molm13	ARRY380	101.333			Mv4-11	NU2058	105.565
Molm13	Duvelisib (IPI-145, INK1197)	101.349			Mv4-11	CZC24832	105.614
Molm13	PD 169316	101.362			Mv4-11	Asiatic acid	105.639
Molm13	SB203580	101.408			Mv4-11	Palbociclib (PD-0332991) hydrochloride	105.663
Molm13	NSC 42834	101.439			Mv4-11	CC-292 (AVL-292)	105.674
Molm13	Rutin	101.517			Mv4-11	NU2058	105.677
Molm13	AR-A014418	101.56			Mv4-11	CUDC-101	105.74
Molm13	Leelamine (hydrochloride)	101.584			Mv4-11	AG-213	105.741
Molm13	SC-514	101.587			Mv4-11	Fostamatinib (R788)	105.746
Molm13	ANA-12	101.59			Mv4-11	Irbinitinib(ARRY-380; ONT-380)	105.795
Molm13	NVP-AEW541 (hydrochloride)	101.596			Mv4-11	Mollugin	105.835
Molm13	Leelamine (hydrochloride)	101.609			Mv4-11	AG-1296	105.863
Molm13	Tofacitinib (CP-690550,Tasocitinib)	101.624			Mv4-11	PF-06447475	105.873
Molm13	SMI-4a	101.651			Mv4-11	Nocodazole	105.881
Molm13	GSK2606414	101.658			Mv4-11	Poziotinib (HM781-36B)	105.904
Molm13	AG-82	101.674			Mv4-11	AS-041164	105.911
Molm13	SP600125	101.705			Mv4-11	AG-82	105.983
Molm13	SC66	101.705			Mv4-11	PF-04217903	105.986
Molm13	D-erythro-Sphingosine C-18	101.748			Mv4-11	CAY10622	106.002
Molm13	ZM 39923 hydrochloride	101.752			Mv4-11	CID755673	106.019
Molm13	PI3065	101.776			Mv4-11	AZD3759	106.028
Molm13	R406	101.785			Mv4-11	GSK-2256098	106.056
Molm13	Ibrutinib (PCI-32765)	101.799			Mv4-11	Triciribine	106.077
Molm13	Lavendustin C	101.853			Mv4-11	XL147 analogue	106.084
Molm13	AM-2394	101.86			Mv4-11	Palbociclib	106.084
Molm13	ZM 323881 hydrochloride	101.891			Mv4-11	Loxiglumide	106.091
Molm13	AT13148	101.896			Mv4-11	Dimethylenastron	106.092
Molm13	Radotinib	101.901			Mv4-11	Perifosine (KRX-0401)	106.098
Molm13	Sesamol	101.911			Mv4-11	ZM306416	106.11
Molm13	Scopoletin	101.959			Mv4-11	SB203580	106.113
Molm13	BMS-777607	101.972			Mv4-11	KN-62	106.152
Molm13	CZC-25146	102.016			Mv4-11	Canertinib dihydrochloride	106.197
Molm13	PD 184161	102.033			Mv4-11	KenPaullone	106.23
Molm13	Tivantinib (ARQ 197)	102.061			Mv4-11	TAS-301	106.243
Molm13	Proglumide	102.079			Mv4-11	Volasertib (BI 6727)	106.296
Molm13	AZD1208	102.129			Mv4-11	(R)-Ruxolitinib (INCB018424)	106.309
Molm13	SP600125	102.151			Mv4-11	GDC-0941	106.323
Molm13	CL-387785 (EKI-785)	102.233			Mv4-11	BIO	106.345
Molm13	SC 79	102.259			Mv4-11	Picropodophyllin (PPP)	106.38
Molm13	SKF-86002	102.285			Mv4-11	LY2835219	106.39
Molm13	FLT3-IN-1	102.331			Mv4-11	Kenpaullone	106.449
Molm13	ZM306416	102.333			Mv4-11	LY2835219 mesylate	106.467
Molm13	TG003	102.335			Mv4-11	Sodium houttuyfonate	106.483
Molm13	Gypenoside XVII	102.349			Mv4-11	R406 free base	106.492
Molm13	ZM 336372	102.355			Mv4-11	Forsythin	106.5
Molm13	HUHS015	102.378			Mv4-11	CEP-33779	106.502
Molm13	R406 free base	102.392			Mv4-11	Bisindolylmaleimide V	106.521
Molm13	BX795	102.395			Mv4-11	VX-702	106.547
Molm13	Gliclazide	102.397			Mv4-11	KI8751	106.566
Molm13	PD153035 hydrochloride	102.422			Mv4-11	Iso-Olomoucine	106.57
Molm13	Scopoletin	102.424			Mv4-11	Tivantinib (ARQ 197)	106.576
Molm13	PP2	102.45			Mv4-11	WP1130	106.577
Molm13	PF-04217903	102.451			Mv4-11	Y-27632 (hydrochloride)	106.584
Molm13	GSK-1059615	102.459			Mv4-11	Antrapurol	106.597
Molm13	PIK-75 (hydrochloride)	102.459			Mv4-11	AG-490 (Tyrphostin B42)	106.598
Molm13	MLN0905	102.461			Mv4-11	Pazopanib	106.604
Molm13	PD153035 hydrochloride	102.511			Mv4-11	LDC1267	106.612
Molm13	XMD8-92	102.633			Mv4-11	Chelerythrine (chloride)	106.623
Molm13	Bisindolylmaleimide IX (mesylate)	102.638			Mv4-11	PD-173955	106.625
Molm13	LH-846	102.679			Mv4-11	SC 79	106.628
Molm13	1-NA-PP1	102.698			Mv4-11	GSK2578215A	106.668
Molm13	WP1066	102.73			Mv4-11	Dacomitinib (PF299804, PF299)	106.737
Molm13	Piceatannol	102.734			Mv4-11	IC-87114	106.752
Molm13	Leelamine	102.742			Mv4-11	PF-477736	106.809
Molm13	Baricitinib†(Phosphate)	102.834			Mv4-11	SKLB 610	106.812
Molm13	TWS119	102.864			Mv4-11	Pelitinib (EKB-569)	106.815
Molm13	SB-415286	102.902			Mv4-11	PF 431396	106.835
Molm13	AS-605240	102.932			Mv4-11	AS-703026	106.863
Molm13	BIBF 1120	102.944			Mv4-11	TCS PIM-1 1	106.93
Molm13	CAY10626	102.945			Mv4-11	SMI-4a	106.932
Molm13	Dabrafenib (GSK2118436)	103.063			Mv4-11	BEZ235 (NVP-BEZ235, Dactolisib)	106.987
Molm13	Daphnetin	103.073			Mv4-11	NH125	106.988
Molm13	LFM-A13	103.076			Mv4-11	B-Raf inhibitor 1	107.02
Molm13	CAY10577	103.086			Mv4-11	Afatinib (BIBW2992) Dimaleate	107.043
Molm13	APY0201	103.087			Mv4-11	7,8-Dihydroxyflavone	107.063
Molm13	Obacunone	103.102			Mv4-11	SGX-523	107.063
Molm13	(S)-H-1152 (hydrochloride)	103.115			Mv4-11	Filgotinib (GLPG0634)	107.085
Molm13	WP1066	103.164			Mv4-11	GDC-0941	107.085
Molm13	SB 202190	103.169			Mv4-11	Erlotinib hydrochloride	107.094
Molm13	Dequalinium chloride	103.201			Mv4-11	IQ-1S	107.1
Molm13	PD 98059	103.207			Mv4-11	Miltefosine	107.103
Molm13	Canertinib dihydrochloride	103.22			Mv4-11	L-779,450	107.163
Molm13	Warfarin	103.265			Mv4-11	AG-18	107.168
Molm13	SKF-86002	103.289			Mv4-11	PIK-293	107.193
Molm13	TCS PIM-1 1	103.306			Mv4-11	Chelerythrine chloride	107.202
Molm13	AS-703026	103.318			Mv4-11	Ellagic acid	107.225
Molm13	BMS-777607	103.334			Mv4-11	ZM 447439	107.229
Molm13	VX-11e	103.41			Mv4-11	NVP 231	107.247
Molm13	Volasertib (BI 6727)	103.523			Mv4-11	Tofacitinib (CP-690550) Citrate	107.256
Molm13	Canertinib (hydrochloride)	103.528			Mv4-11	SB 202190	107.284
Molm13	HUHS015	103.563			Mv4-11	AKT inhibitor VIII	107.303
Molm13	CGK 733	103.576			Mv4-11	KT 5823	107.332
Molm13	Rutin	103.608			Mv4-11	Gypenoside XVII	107.385
Molm13	JNJ-10198409	103.684			Mv4-11	Kaempferitrin	107.404
Molm13	AZ20	103.693			Mv4-11	SC66	107.407
Molm13	MK8745	103.703			Mv4-11	WHI-P131	107.445
Molm13	AS-252424	103.763			Mv4-11	H-9 (hydrochloride)	107.45
Molm13	TBB(NSC 231634)	103.784			Mv4-11	Janex 1	107.458
Molm13	IQ-1S	103.801			Mv4-11	Leelamine	107.481
Molm13	Perifosine (KRX-0401)	103.875			Mv4-11	LY-2874455	107.483
Molm13	ZM 323881 hydrochloride	103.882			Mv4-11	LDN-193189	107.486
Molm13	AZD1208	103.909			Mv4-11	R112	107.514
Molm13	Sesamol	103.913			Mv4-11	NU7026	107.528
Molm13	(S)-Glycyl-H-1152 (hydrochloride)	103.96			Mv4-11	NVP-BVU972	107.533
Molm13	Pseudolaric Acid B	103.965			Mv4-11	Lidocaine Hydrochloride hydrate	107.546
Molm13	Icotinib Hydrochloride	103.982			Mv4-11	CZC-25146	107.588
Molm13	PD184352 (CI-1040)	104.022			Mv4-11	LY364947	107.676
Molm13	AG-1296	104.034			Mv4-11	SGI-1776 free base	107.705
Molm13	MLN8237(Alisertib)	104.041			Mv4-11	Dequalinium chloride	107.711
Molm13	LY364947	104.12			Mv4-11	MK8745	107.727
Molm13	AG-490	104.132			Mv4-11	1NM-PP1	107.735
Molm13	Picropodophyllin (PPP)	104.134			Mv4-11	TG003	107.746
Molm13	BAY 11-7082	104.138			Mv4-11	Fasudil (HA-1077) hydrochloride	107.806
Molm13	WHI-P258	104.19			Mv4-11	LRRK2-IN-1	107.841
Molm13	AZD3759	104.209			Mv4-11	CAY10626	107.857
Molm13	WHI-P180	104.258			Mv4-11	CGP 57380	107.859
Molm13	AG-879	104.259			Mv4-11	MK-8776 (SCH 900776)	107.866
Molm13	Imatinib (STI571)	104.311			Mv4-11	Betaine hydrochloride	107.87
Molm13	Amlexanox	104.349			Mv4-11	B-Raf inhibitor 1	107.893
Molm13	Necrostatin-5	104.427			Mv4-11	SU6656	107.916
Molm13	SC-514	104.644			Mv4-11	PD 169316	107.981
Molm13	Volasertib (BI 6727)	104.655			Mv4-11	Warfarin	108.001
Molm13	AICAR (Acadesine)	104.696			Mv4-11	NU 7026	108.018
Molm13	NU7441 (KU-57788)	104.702			Mv4-11	Fruquintinib	108.05
Molm13	LEE011	104.712			Mv4-11	GNE9605	108.06
Molm13	Go 6983	104.767			Mv4-11	SB202190 (FHPI)	108.073
Molm13	Piceatannol	104.792			Mv4-11	PLX647	108.075
Molm13	Penciclovir	104.879			Mv4-11	Trametinib (GSK1120212)	108.082
Molm13	JNK-IN-7	104.925			Mv4-11	BI 2536	108.105
Molm13	VE822	104.973			Mv4-11	CAY10505	108.201
Molm13	CAY10561	104.986			Mv4-11	CHIR98014	108.242
Molm13	SZL P1-41	105.074			Mv4-11	Canertinib (hydrochloride)	108.246
Molm13	NVP-BEZ235	105.092			Mv4-11	OSI-906 (Linsitinib)	108.271
Molm13	BIX02189	105.116			Mv4-11	SP 600125	108.279
Molm13	YM-201636	105.184			Mv4-11	Psoralidin	108.311
Molm13	Bisindolylmaleimide I	105.202			Mv4-11	Filgotinib (GLPG0634)	108.321
Molm13	PHA-767491	105.301			Mv4-11	CAY10576	108.321
Molm13	CID755673	105.351			Mv4-11	O-1918	108.351
Molm13	PD 169316	105.355			Mv4-11	IC261	108.364
Molm13	Acalabrutinib	105.416			Mv4-11	GSK1838705A	108.394
Molm13	TTP 22	105.462			Mv4-11	NVP-AEW541 (hydrochloride)	108.431
Molm13	SB-216763	105.499			Mv4-11	AG-879	108.49
Molm13	PHT-427	105.507			Mv4-11	HUHS015	108.534
Molm13	AZD7545	105.576			Mv4-11	GNE-0877	108.546
Molm13	Chelerythrine chloride	105.592			Mv4-11	Chelerythrine (chloride)	108.551
Molm13	RN486	105.637			Mv4-11	ETP46464	108.56
Molm13	AZD-9291 mesylate	105.663			Mv4-11	Dacomitinib (PF299804, PF299)	108.583
Molm13	Scutellarein	105.713			Mv4-11	YM-201636	108.625
Molm13	GNE7915	105.741			Mv4-11	Selumetinib (AZD6244)	108.675
Molm13	IM-12	105.765			Mv4-11	SSR128129E	108.69
Molm13	XMD17-109	105.811			Mv4-11	Gˆ 6983	108.713
Molm13	PD173074	105.818			Mv4-11	Rociletinib (CO-1686, AVL-301)	108.749
Molm13	GNE7915	105.832			Mv4-11	Ruboxistaurin hydrochloride	108.79
Molm13	Curcumol	105.887			Mv4-11	Ensartinib	108.803
Molm13	LY-2874455	105.904			Mv4-11	CAY10657	108.849
Molm13	Dacomitinib (PF299804, PF299)	105.905			Mv4-11	GNF-5	108.878
Molm13	Piceatannol	105.914			Mv4-11	SAR131675	108.884
Molm13	PD 98059	105.927			Mv4-11	Gliclazide	108.926
Molm13	Apatinib	105.937			Mv4-11	Apatinib	108.945
Molm13	SKLB1002	105.958			Mv4-11	AT13148	108.947
Molm13	Vemurafenib (PLX4032, RG7204)	106.058			Mv4-11	SCH772984	108.952
Molm13	PIK-93	106.061			Mv4-11	ASP 3026	108.96
Molm13	HS-173	106.062			Mv4-11	SBE 13 hydrochloride	108.967
Molm13	PD184352 (CI-1040)	106.075			Mv4-11	Momordin Ic	109.026
Molm13	PD 166326	106.091			Mv4-11	TAK632	109.034
Molm13	Erlotinib	106.102			Mv4-11	PH797804	109.062
Molm13	GSK-2636771	106.139			Mv4-11	Nintedanib (BIBF 1120)	109.096
Molm13	LDN212854	106.162			Mv4-11	CGI1746	109.11
Molm13	UNC2881	106.229			Mv4-11	BML-275	109.163
Molm13	LY364947	106.23			Mv4-11	JNK-IN-8	109.193
Molm13	XL413	106.288			Mv4-11	CAY10578	109.205
Molm13	AS-605240	106.355			Mv4-11	Mubritinib (TAK 165)	109.206
Molm13	MLN8054	106.46			Mv4-11	Tideglusib	109.239
Molm13	SRPIN340	106.478			Mv4-11	IRAK-1/4 Inhibitor	109.272
Molm13	Kaempferitrin	106.485			Mv4-11	AS-605240 (potassium salt)	109.275
Molm13	GSK650394	106.526			Mv4-11	KN-62	109.286
Molm13	Apitolisib (GDC-0980, RG7422)	106.529			Mv4-11	XMD17-109	109.296
Molm13	Antrapurol	106.531			Mv4-11	BML-277	109.3
Molm13	Ro 31-8220 Mesylate	106.533			Mv4-11	Erlotinib	109.31
Molm13	IRAK-1/4 Inhibitor	106.551			Mv4-11	PD153035 hydrochloride	109.331
Molm13	INCB28060(Capmatinib)	106.578			Mv4-11	Osu-03012	109.351
Molm13	Regorafenib (BAY 73-4506)	106.58			Mv4-11	TTP 22	109.367
Molm13	KW2449	106.588			Mv4-11	Scopoletin	109.381
Molm13	DRB	106.598			Mv4-11	BMS-777607	109.388
Molm13	GNE-0877	106.614			Mv4-11	U0126-EtOH	109.416
Molm13	Palbociclib (PD-0332991) hydrochloride	106.627			Mv4-11	Semaxinib(SU 5416)	109.429
Molm13	Streptozocin	106.666			Mv4-11	CAL-101 (Idelalisib, GS-1101)	109.445
Molm13	LDK378(Ceritinib)	106.691			Mv4-11	KRCA-0008	109.457
Molm13	ML-9	106.695			Mv4-11	CVT-313	109.473
Molm13	DMH1	106.701			Mv4-11	Semaxanib (SU5416)	109.492
Molm13	K858	106.72			Mv4-11	CHIR-98014	109.515
Molm13	Purvalanol A	106.755			Mv4-11	LDN-214117	109.545
Molm13	B-Raf inhibitor 1	106.85			Mv4-11	BI-D1870	109.557
Molm13	BIO	106.864			Mv4-11	PD173074	109.616
Molm13	6-BIO	106.905			Mv4-11	Brivanib Alaninate (BMS-582664)	109.643
Molm13	Masitinib (AB1010)	106.909			Mv4-11	AG-1478	109.715
Molm13	KN-93	106.932			Mv4-11	HA-1077 (hydrochloride)	109.724
Molm13	SAR131675	106.949			Mv4-11	Ginsenoside Rh2	109.781
Molm13	Bardoxolone Methyl	107.037			Mv4-11	KRCA-0008	109.801
Molm13	Bisindolylmaleimide XI (hydrochloride)	107.041			Mv4-11	PD 98059	109.818
Molm13	AG-490 (Tyrphostin B42)	107.051			Mv4-11	MLN8054	109.834
Molm13	Genistein	107.054			Mv4-11	Regorafenib (BAY 73-4506)	109.835
Molm13	KU55933	107.056			Mv4-11	SU6656	109.843
Molm13	Torin 1	107.106			Mv4-11	ZM 336372	109.856
Molm13	CHIR-98014	107.121			Mv4-11	AZD1080	109.873
Molm13	CVT-313	107.21			Mv4-11	XL413	109.888
Molm13	Sodium houttuyfonate	107.222			Mv4-11	CaMKP Inhibitor	109.904
Molm13	(+)-Fangchinoline	107.239			Mv4-11	Ddr1-In-1	109.934
Molm13	LDN-214117	107.314			Mv4-11	FLT3-IN-1	109.989
Molm13	R406	107.328			Mv4-11	PHA-767491	109.996
Molm13	ISRIB	107.348			Mv4-11	GW441756	110.033
Molm13	OTSSP167	107.397			Mv4-11	SP600125	110.035
Molm13	SKLB 610	107.432			Mv4-11	N,N-Dimethylsphingosine	110.061
Molm13	BEZ235 (NVP-BEZ235, Dactolisib)	107.441			Mv4-11	Warfarin sodium	110.068
Molm13	VE822	107.444			Mv4-11	Notoginsenoside R1	110.085
Molm13	Lenvatinib (E7080)	107.474			Mv4-11	Wortmannin	110.153
Molm13	Lupeol	107.498			Mv4-11	ZM 39923 hydrochloride	110.171
Molm13	AZD2858	107.503			Mv4-11	PS-1145	110.209
Molm13	Wortmannin	107.508			Mv4-11	KT 5823	110.237
Molm13	Valproic Acid (sodium salt)	107.517			Mv4-11	TG003	110.255
Molm13	WH-4-023	107.543			Mv4-11	Wortmannin	110.28
Molm13	AS-252424	107.562			Mv4-11	Ribavirin	110.281
Molm13	Tivantinib (ARQ 197)	107.594			Mv4-11	PI-103	110.301
Molm13	Leflunomide	107.614			Mv4-11	AS-605240	110.364
Molm13	Afuresertib	107.685			Mv4-11	AG-1478	110.417
Molm13	Osu-03012	107.712			Mv4-11	Fasudil	110.449
Molm13	LY2409881 trihydrochloride	107.814			Mv4-11	Ruxolitinib	110.476
Molm13	Lithium citrate tribasic tetrahydrate	107.899			Mv4-11	Scopoletin	110.489
Molm13	Carbazochrome	107.899			Mv4-11	Loxiglumide	110.498
Molm13	Azd6738	107.935			Mv4-11	LDC1267	110.528
Molm13	Ribavirin	107.965			Mv4-11	ZM 323881 hydrochloride	110.552
Molm13	Erbstatin analog	107.978			Mv4-11	Erlotinib	110.559
Molm13	Alectinib	108.03			Mv4-11	MLN8237(Alisertib)	110.642
Molm13	GSK650394	108.044			Mv4-11	Motesanib (AMG-706)	110.662
Molm13	MK1775	108.049			Mv4-11	Sodium†Dichloroacetate	110.683
Molm13	BYL-719(Alpelisib)	108.058			Mv4-11	PF-4708671	110.688
Molm13	CID755673	108.072			Mv4-11	Sodium†Dichloroacetate	110.713
Molm13	CEP-33779	108.175			Mv4-11	LFM-A13	110.74
Molm13	GSK2606414	108.231			Mv4-11	Pyridone 6	110.756
Molm13	PS-1145	108.257			Mv4-11	Palbociclib (PD0332991) Isethionate	110.764
Molm13	PI3-Kinase ? Inhibitor 2	108.263			Mv4-11	Thiazovivin	110.792
Molm13	2-Chloropyrazine	108.303			Mv4-11	Regorafenib (BAY 73-4506)	110.811
Molm13	MLN8054	108.306			Mv4-11	Palbociclib (PD0332991) Isethionate	110.813
Molm13	Amuvatinib(MP470)	108.349			Mv4-11	Saracatinib (AZD0530)	110.813
Molm13	PF06463922	108.352			Mv4-11	NSC 210902	110.851
Molm13	O-1918	108.365			Mv4-11	17?-hydroxy Wortmannin	110.864
Molm13	OSI 930	108.391			Mv4-11	PD 184161	110.895
Molm13	Coumarin	108.444			Mv4-11	Adenosine 5'-monophosphate	110.995
Molm13	Iso-Olomoucine	108.454			Mv4-11	Apatinib	111.027
Molm13	Honokiol	108.456			Mv4-11	Baricitinib (LY3009104, INCB028050)	111.038
Molm13	Bisindolylmaleimide IV	108.47			Mv4-11	Rociletinib (CO-1686, AVL-301)	111.044
Molm13	NVP 231	108.482			Mv4-11	BAW2881	111.047
Molm13	CAY10567	108.531			Mv4-11	ML-9	111.055
Molm13	LDN212854	108.547			Mv4-11	Axitinib	111.064
Molm13	Mutant EGFR inhibitor	108.576			Mv4-11	K 02288	111.116
Molm13	AZD8931 (Sapitinib)	108.665			Mv4-11	Antrapurol	111.123
Molm13	LY2228820	108.744			Mv4-11	3-Methyladenine	111.124
Molm13	PD 166326	108.776			Mv4-11	CAY10567	111.125
Molm13	Glabridin	108.801			Mv4-11	Afuresertib	111.131
Molm13	IC261	108.811			Mv4-11	PS-1145	111.135
Molm13	ZSTK474	108.853			Mv4-11	AZD9291	111.184
Molm13	Sennoside B	108.896			Mv4-11	PD 98059	111.197
Molm13	LY2603618	108.904			Mv4-11	CP21R7	111.2
Molm13	Tyrphostin 9	108.91			Mv4-11	SB-216763	111.204
Molm13	NVP-BEZ235	108.912			Mv4-11	Bisindolylmaleimide XI (hydrochloride)	111.216
Molm13	Triciribine	108.928			Mv4-11	L-threo-Sphingosine C-18	111.245
Molm13	Forsythin	108.948			Mv4-11	Gandotinib (LY2784544)	111.269
Molm13	PI3-Kinase ? Inhibitor 2	108.964			Mv4-11	Streptozocin	111.29
Molm13	Lapatinib (GW-572016) Ditosylate	109.045			Mv4-11	SC-202671	111.299
Molm13	AG-825	109.047			Mv4-11	Arachidonic Acid Leelamide	111.329
Molm13	TH588	109.109			Mv4-11	K858	111.357
Molm13	Erlotinib	109.111			Mv4-11	Solcitinib	111.414
Molm13	PRT062607 (P505-15, BIIB057) hydrochloride	109.111			Mv4-11	PF-562271	111.461
Molm13	OSI-906 (Linsitinib)	109.113			Mv4-11	Imatinib Mesylate (STI571)	111.484
Molm13	CAL-101 (Idelalisib, GS-1101)	109.156			Mv4-11	Canertinib (CI-1033)	111.491
Molm13	PF670462	109.176			Mv4-11	YM201636	111.497
Molm13	Tideglusib	109.222			Mv4-11	BMS-265246	111.527
Molm13	Sodium houttuyfonate	109.304			Mv4-11	Baricitinib†(Phosphate)	111.54
Molm13	BML-277	109.432			Mv4-11	Phthalazinone pyrazole	111.545
Molm13	Warfarin sodium	109.449			Mv4-11	PD 173074	111.589
Molm13	AZ5104	109.471			Mv4-11	BLU9931	111.608
Molm13	kb NB 142-70	109.481			Mv4-11	PH797804	111.616
Molm13	WP1130	109.504			Mv4-11	BIO	111.631
Molm13	SC66	109.519			Mv4-11	Ruxolitinib	111.651
Molm13	Thiazovivin	109.524			Mv4-11	K858	111.685
Molm13	CGP 57380	109.534			Mv4-11	Picropodophyllin (PPP)	111.718
Molm13	Apitolisib (GDC-0980, RG7422)	109.664			Mv4-11	Valproic Acid (sodium salt)	111.812
Molm13	Lithium citrate tribasic tetrahydrate	109.7			Mv4-11	WH-4-023	111.813
Molm13	PHT-427	109.716			Mv4-11	Pseudolaric Acid B	111.905
Molm13	O-1918	109.719			Mv4-11	SC-514	111.908
Molm13	PLX4720	109.73			Mv4-11	ENMD-2076	111.94
Molm13	Janex 1	109.74			Mv4-11	Ro3280	111.974
Molm13	CAY10505	109.758			Mv4-11	Icotinib Hydrochloride	111.995
Molm13	NU 7026	109.763			Mv4-11	BYL-719(Alpelisib)	112.018
Molm13	Ro 31-8220 Mesylate	109.763			Mv4-11	(R)-Ruxolitinib (INCB018424)	112.024
Molm13	RG-14620	109.798			Mv4-11	TWS119	112.136
Molm13	ISRIB	109.89			Mv4-11	AZ191	112.159
Molm13	Solcitinib	109.914			Mv4-11	ZM 39923 hydrochloride	112.162
Molm13	RG-13022	109.937			Mv4-11	AZD8931 (Sapitinib)	112.162
Molm13	K 02288	109.95			Mv4-11	GSK1838705A	112.201
Molm13	TGX-221	109.972			Mv4-11	Go 6983	112.205
Molm13	GNE9605	109.985			Mv4-11	VX-745	112.226
Molm13	AG-494	110.055			Mv4-11	Azd6738	112.24
Molm13	CC-292 (AVL-292)	110.062			Mv4-11	CAY10567	112.25
Molm13	FRAX597	110.067			Mv4-11	PI3K-IN-2	112.253
Molm13	KN-62	110.114			Mv4-11	TSU-68 (SU6668, Orantinib)	112.313
Molm13	6-BIO	110.181			Mv4-11	DCC-2036 (Rebastinib)	112.316
Molm13	TTP 22	110.19			Mv4-11	MK-2206 dihydrochloride	112.319
Molm13	GSK2334470	110.199			Mv4-11	Canertinib (CI-1033)	112.343
Molm13	BI-D1870	110.219			Mv4-11	Dasatinib monohydrate	112.344
Molm13	GSK1059615	110.342			Mv4-11	Asiaticoside	112.405
Molm13	SB 203580	110.402			Mv4-11	TG100-115	112.437
Molm13	U0126-EtOH	110.427			Mv4-11	Bisindolylmaleimide IX (mesylate)	112.44
Molm13	ID-8	110.435			Mv4-11	Torin 1	112.45
Molm13	Momelotinib (CYT387)	110.498			Mv4-11	Phenylindione	112.467
Molm13	BMS-265246	110.505			Mv4-11	AZD2014	112.493
Molm13	GSK-1059615	110.512			Mv4-11	Dimethylenastron	112.51
Molm13	SU6656	110.544			Mv4-11	GSK1059615	112.607
Molm13	GNE-0877	110.58			Mv4-11	PLX647	112.627
Molm13	PP242	110.615			Mv4-11	PIK-93	112.63
Molm13	BIX02188	110.646			Mv4-11	3-Methyladenine	112.668
Molm13	Icaritin	110.74			Mv4-11	Isoprenaline hydrochloride	112.697
Molm13	CID-2011756	110.789			Mv4-11	SB-415286	112.708
Molm13	Canertinib (CI-1033)	110.791			Mv4-11	KX1-004	112.72
Molm13	Ginsenoside Rg2	110.814			Mv4-11	H-8 (hydrochloride)	112.744
Molm13	KX1-004	110.877			Mv4-11	Bohemine	112.745
Molm13	KT 5823	110.915			Mv4-11	NU 7026	112.793
Molm13	PS-1145	110.921			Mv4-11	AP26113	112.829
Molm13	HMN214	110.929			Mv4-11	Dasatinib	112.851
Molm13	BMS 599626	111.009			Mv4-11	Sphingosine Kinase Inhibitor 2	112.864
Molm13	Poziotinib (HM781-36B)	111.059			Mv4-11	SC-514	112.881
Molm13	GSK2656157	111.197			Mv4-11	kb NB 142-70	112.887
Molm13	Scutellarein	111.23			Mv4-11	Lithium citrate tribasic tetrahydrate	112.89
Molm13	Isoprenaline hydrochloride	111.274			Mv4-11	Lauric Acid Leelamide	112.904
Molm13	AKT inhibitor VIII	111.333			Mv4-11	H-89 (hydrochloride)	112.937
Molm13	BIX02189	111.335			Mv4-11	RN486	112.954
Molm13	NVP-BVU972	111.356			Mv4-11	HS-173	112.966
Molm13	(R)-Roscovitine	111.373			Mv4-11	Arachidonic Acid Leelamide	112.97
Molm13	ML347	111.378			Mv4-11	RG-14620	112.984
Molm13	AZD1080	111.392			Mv4-11	AT 7519 hydrochloride salt	113.015
Molm13	CZC24832	111.432			Mv4-11	Ginsenoside Rh2	113.041
Molm13	BIO	111.638			Mv4-11	AZD5438	113.046
Molm13	GSK-2256098	111.647			Mv4-11	Sesamol	113.048
Molm13	INCB28060(Capmatinib)	111.666			Mv4-11	(R)-Roscovitine	113.068
Molm13	LFM-A13	111.669			Mv4-11	Rutin	113.107
Molm13	Poziotinib (HM781-36B)	111.676			Mv4-11	TAE226 (NVP-TAE226)	113.163
Molm13	Oclacitinib	111.723			Mv4-11	XL147 analogue	113.167
Molm13	AZD5438	111.732			Mv4-11	MLN0905	113.18
Molm13	CH5183284 (Debio-1347)	111.733			Mv4-11	ZSTK474	113.186
Molm13	GNF-2	111.756			Mv4-11	AG-879	113.262
Molm13	AT 7519 hydrochloride salt	111.796			Mv4-11	Sunitinib	113.301
Molm13	TG003	111.821			Mv4-11	INCB28060(Capmatinib)	113.305
Molm13	AR-A014418	111.829			Mv4-11	BLU9931	113.319
Molm13	FLT3-IN-2	111.865			Mv4-11	Perifosine (KRX-0401)	113.347
Molm13	AG-879	111.908			Mv4-11	(+)-Fangchinoline	113.382
Molm13	AG18	111.948			Mv4-11	2-Chloropyrazine	113.473
Molm13	WHI-P131	112.03			Mv4-11	Lenvatinib (E7080)	113.494
Molm13	AEE788	112.134			Mv4-11	GNE 477	113.494
Molm13	Pyridone 6	112.147			Mv4-11	PI3065	113.498
Molm13	AZ 3146	112.22			Mv4-11	Rutin	113.504
Molm13	LY2835219	112.233			Mv4-11	Corosolic acid	113.506
Molm13	Pelitinib (EKB-569)	112.242			Mv4-11	CZC-25146	113.584
Molm13	NU7441 (KU-57788)	112.27			Mv4-11	VE822	113.588
Molm13	Nocodazole	112.362			Mv4-11	PIK-inhibitors	113.592
Molm13	U-0126	112.384			Mv4-11	AMG-337	113.625
Molm13	CaMKP Inhibitor	112.405			Mv4-11	Amuvatinib(MP470)	113.673
Molm13	SBE 13 hydrochloride	112.42			Mv4-11	OSI 930	113.694
Molm13	Ellagic acid	112.42			Mv4-11	Briciclib	113.716
Molm13	AG18	112.437			Mv4-11	NU7441 (KU-57788)	113.782
Molm13	FLT3-IN-2	112.469			Mv4-11	PF670462	113.806
Molm13	LDN-193189	112.472			Mv4-11	AZD7545	113.904
Molm13	CUDC-101	112.479			Mv4-11	2,3-Butanedione 2-Monoxime	113.977
Molm13	Phenformin hydrochloride	112.492			Mv4-11	Apitolisib (GDC-0980, RG7422)	114.001
Molm13	Necrostatin-1	112.546			Mv4-11	H-9 (hydrochloride)	114.028
Molm13	NVP-ADW742	112.581			Mv4-11	Cediranib (AZD2171)	114.12
Molm13	AZD1080	112.596			Mv4-11	Altiratinib(DCC2701)	114.144
Molm13	CEP-32496	112.673			Mv4-11	Gandotinib (LY2784544)	114.149
Molm13	WHI-P154	112.714			Mv4-11	SBI-0206965	114.182
Molm13	PQ401	112.714			Mv4-11	LY2603618	114.225
Molm13	ML-9	112.745			Mv4-11	Sesamol	114.231
Molm13	Chelerythrine (chloride)	112.773			Mv4-11	Carbazochrome	114.251
Molm13	OSI 930	112.797			Mv4-11	GSK923295	114.267
Molm13	Ruxolitinib	112.808			Mv4-11	PD 184161	114.267
Molm13	Dinaciclib (SCH727965)	112.862			Mv4-11	PP2	114.318
Molm13	GLPG0634 analogue	112.924			Mv4-11	KX1-004	114.407
Molm13	LY2409881 trihydrochloride	112.954			Mv4-11	Lapatinib (GW-572016) Ditosylate	114.459
Molm13	CAY10574	113.014			Mv4-11	Motesanib Diphosphate (AMG-706)	114.471
Molm13	WHI-P180	113.111			Mv4-11	Adenosine 5'-monophosphate	114.497
Molm13	Sphingosine Kinase Inhibitor 2	113.127			Mv4-11	Mutant EGFR inhibitor	114.567
Molm13	BMS-265246	113.128			Mv4-11	IC-87114	114.588
Molm13	AMG-337	113.173			Mv4-11	HA-1077 (hydrochloride)	114.607
Molm13	AG-82	113.248			Mv4-11	Afuresertib	114.609
Molm13	ALK inhibitor 2	113.251			Mv4-11	ALK inhibitor 2	114.704
Molm13	Nocodazole	113.256			Mv4-11	CC-292 (AVL-292)	114.714
Molm13	Ensartinib	113.302			Mv4-11	RKI-1447	114.797
Molm13	TAK632	113.313			Mv4-11	L-threo-Sphingosine C-18	114.814
Molm13	YM201636	113.369			Mv4-11	Canertinib dihydrochloride	114.823
Molm13	Obacunone	113.396			Mv4-11	Kenpaullone	114.835
Molm13	3-Methyladenine	113.423			Mv4-11	Fangchinoline	114.846
Molm13	SAR131675	113.455			Mv4-11	Crizotinib (PF-02341066)	114.85
Molm13	AT13148	113.577			Mv4-11	CNX-774	114.861
Molm13	Flavopiridol (Alvocidib) hydrochloride	113.577			Mv4-11	WHI-P180	114.882
Molm13	VX-11e	113.583			Mv4-11	Janex 1	114.981
Molm13	LDK378(Ceritinib)	113.617			Mv4-11	PF670462	114.996
Molm13	Gefitinib	113.699			Mv4-11	UNC2881	115.029
Molm13	GSK1838705A	113.717			Mv4-11	Phenylindione	115.05
Molm13	Mubritinib (TAK 165)	113.79			Mv4-11	Chloropyramine hydrochloride	115.127
Molm13	CP21R7	113.839			Mv4-11	Purvalanol A	115.135
Molm13	Pyridoxine	113.915			Mv4-11	(+)-Fangchinoline	115.17
Molm13	Sotrastaurin	113.925			Mv4-11	CAY10561	115.171
Molm13	GSK2334470	113.93			Mv4-11	Gefitinib (ZD1839)	115.18
Molm13	CDK4-IN-1	113.942			Mv4-11	AG-1478	115.188
Molm13	Nilotinib (AMN-107)	113.951			Mv4-11	AS-605240	115.188
Molm13	ZM306416	113.973			Mv4-11	ML167	115.197
Molm13	Flavopiridol (Alvocidib) hydrochloride	114.115			Mv4-11	NH125	115.2
Molm13	AZD4547	114.151			Mv4-11	Lithium citrate tribasic tetrahydrate	115.238
Molm13	Pilaralisib (XL147)	114.198			Mv4-11	SB216763	115.294
Molm13	Altiratinib(DCC2701)	114.244			Mv4-11	UNC0064-12	115.316
Molm13	AS-605240 (potassium salt)	114.256			Mv4-11	GW2580	115.379
Molm13	SP 600125	114.283			Mv4-11	PP121	115.403
Molm13	AS-604850	114.308			Mv4-11	D 4476	115.406
Molm13	SP 600125	114.428			Mv4-11	UNC2881	115.422
Molm13	Imatinib Mesylate (STI571)	114.482			Mv4-11	WHI-P258	115.471
Molm13	Afuresertib	114.542			Mv4-11	CID-2011756	115.553
Molm13	GSK2578215A	114.564			Mv4-11	17?-hydroxy Wortmannin	115.647
Molm13	D 4476	114.604			Mv4-11	CP21R7	115.687
Molm13	CP21R7	114.61			Mv4-11	LH-846	115.693
Molm13	Rociletinib (CO-1686, AVL-301)	114.625			Mv4-11	AG-17	115.812
Molm13	Lapatinib ditosylate monohydrate	114.633			Mv4-11	Radotinib	115.886
Molm13	LFM-A13	114.648			Mv4-11	PD173074	115.938
Molm13	H-8 (hydrochloride)	114.701			Mv4-11	MLN1117	115.939
Molm13	GSK1059615	114.758			Mv4-11	AMG-337	115.947
Molm13	Erlotinib hydrochloride	114.871			Mv4-11	SL-327	115.962
Molm13	Warfarin	114.888			Mv4-11	Dasatinib	115.978
Molm13	CID-2011756	114.939			Mv4-11	S49076	115.978
Molm13	Axitinib	114.985			Mv4-11	AS-605240 (potassium salt)	115.995
Molm13	Ginsenoside Rh2	115			Mv4-11	O-1918	116.066
Molm13	Tunicamycin	115.038			Mv4-11	Thiazovivin	116.073
Molm13	Gefitinib	115.051			Mv4-11	AZD9291	116.074
Molm13	Y-27632 dihydrochloride	115.098			Mv4-11	CAY10577	116.121
Molm13	CZC-54252	115.141			Mv4-11	Solcitinib	116.125
Molm13	Palbociclib (PD-0332991) hydrochloride	115.158			Mv4-11	GLPG0634 analogue	116.142
Molm13	AG-825	115.165			Mv4-11	LDN-193189	116.172
Molm13	CGK 733	115.193			Mv4-11	KN-93	116.202
Molm13	AZ20	115.218			Mv4-11	AG18	116.221
Molm13	CHIR-99021	115.251			Mv4-11	SU11274	116.254
Molm13	Irbinitinib(ARRY-380; ONT-380)	115.258			Mv4-11	CHIR-99021	116.278
Molm13	HA-1077 (hydrochloride)	115.29			Mv4-11	Chelerythrine chloride	116.339
Molm13	LDN-214117	115.379			Mv4-11	KN-92 (hydrochloride)	116.37
Molm13	SU6656	115.409			Mv4-11	JNK-IN-8	116.481
Molm13	KX1-004	115.413			Mv4-11	Asiaticoside	116.493
Molm13	AICAR (Acadesine)	115.426			Mv4-11	AZ5104	116.512
Molm13	CGI1746	115.437			Mv4-11	BGJ398 (NVP-BGJ398)	116.513
Molm13	KN-92 (hydrochloride)	115.454			Mv4-11	NQDI-1	116.513
Molm13	PI3K-IN-2	115.636			Mv4-11	SAR245409 (XL765)	116.515
Molm13	PIK-293	115.706			Mv4-11	MLN8237(Alisertib)	116.548
Molm13	PND-1186	115.728			Mv4-11	Lonidamine	116.594
Molm13	BMS-754807	115.729			Mv4-11	D 4476	116.738
Molm13	Rigosertib (ON-01910)	115.732			Mv4-11	Icaritin	116.767
Molm13	AZ191	115.792			Mv4-11	GSK1059615	116.779
Molm13	SB-431542	115.864			Mv4-11	AS 602801	116.783
Molm13	kb-NB77-78	115.882			Mv4-11	Sotrastaurin	116.854
Molm13	CCT018159	115.889			Mv4-11	PLX-3397	116.888
Molm13	S-Ruxolitinib	115.903			Mv4-11	Chrysophanic Acid	116.962
Molm13	Afatinib (BIBW2992) Dimaleate	115.969			Mv4-11	Warfarin sodium	117.005
Molm13	XMD17-109	115.997			Mv4-11	Pilaralisib (XL147)	117.029
Molm13	Isoprenaline hydrochloride	116.108			Mv4-11	Azd6738	117.031
Molm13	ML167	116.157			Mv4-11	PD153035 hydrochloride	117.031
Molm13	CH5183284 (Debio-1347)	116.202			Mv4-11	Nintedanib (BIBF 1120)	117.096
Molm13	Penciclovir	116.206			Mv4-11	SAR245409 (XL765)	117.1
Molm13	CAY10621	116.223			Mv4-11	VX-11e	117.138
Molm13	SB-415286	116.227			Mv4-11	SC-202671	117.193
Molm13	TG003	116.272			Mv4-11	SRPIN340	117.202
Molm13	GW441756	116.287			Mv4-11	AS-041164	117.278
Molm13	GSK2656157	116.31			Mv4-11	FR180204	117.297
Molm13	Bisindolylmaleimide V	116.31			Mv4-11	Daphnetin	117.302
Molm13	PP121	116.349			Mv4-11	KN-62	117.309
Molm13	MPI-0479605	116.382			Mv4-11	PP242	117.405
Molm13	AZD3759	116.413			Mv4-11	LY364947	117.414
Molm13	CDK4-IN-1	116.453			Mv4-11	SU 6668	117.448
Molm13	SC-202671	116.527			Mv4-11	SB1317	117.46
Molm13	SB 203580 (hydrochloride)	116.595			Mv4-11	Ro-3306	117.534
Molm13	IC-87114	116.724			Mv4-11	Irbinitinib(ARRY-380; ONT-380)	117.553
Molm13	SBI-0206965	116.816			Mv4-11	Gliclazide	117.575
Molm13	(S)-Glycyl-H-1152 (hydrochloride)	116.857			Mv4-11	Gefitinib (ZD1839)	117.595
Molm13	2-Chloropyrazine	116.887			Mv4-11	1-NA-PP1	117.639
Molm13	NG-52	116.988			Mv4-11	PQ401	117.652
Molm13	Arachidonic Acid Leelamide	117.019			Mv4-11	CAY10657	117.737
Molm13	Nilotinib	117.033			Mv4-11	AICAR (Acadesine)	117.836
Molm13	Lenvatinib (E7080)	117.099			Mv4-11	CX-6258	117.84
Molm13	BIX02188	117.131			Mv4-11	kb-NB77-78	117.867
Molm13	Asiaticoside	117.208			Mv4-11	NU 6102	117.883
Molm13	PD 184161	117.225			Mv4-11	LY2409881 trihydrochloride	117.898
Molm13	BYL-719(Alpelisib)	117.229			Mv4-11	LY2835219 mesylate	118.035
Molm13	TWS119	117.255			Mv4-11	NSC 42834	118.038
Molm13	Antrapurol	117.27			Mv4-11	TWS119	118.097
Molm13	PP2	117.28			Mv4-11	Erbstatin analog	118.148
Molm13	Acalabrutinib	117.317			Mv4-11	SB 203580	118.152
Molm13	Fasudil	117.358			Mv4-11	AT 7519 hydrochloride salt	118.206
Molm13	GNE 477	117.428			Mv4-11	PF-04217903	118.241
Molm13	AZ 960	117.437			Mv4-11	Rigosertib (ON-01910)	118.253
Molm13	AG-183	117.562			Mv4-11	BML-277	118.281
Molm13	Olomoucine	117.577			Mv4-11	AG-99	118.371
Molm13	NVP-AEW541 (hydrochloride)	117.633			Mv4-11	BI-D1870	118.41
Molm13	CX-6258	117.635			Mv4-11	FRAX597	118.45
Molm13	AG-370	117.696			Mv4-11	TAK632	118.475
Molm13	PIK-293	117.75			Mv4-11	MPI-0479605	118.493
Molm13	Ro3280	117.77			Mv4-11	CDK4-IN-1	118.517
Molm13	CEP-32496	117.867			Mv4-11	Vitamin E	118.531
Molm13	Ginsenoside Rh2	117.93			Mv4-11	Ddr1-In-1	118.54
Molm13	SB203580	118.011			Mv4-11	CH5183284 (Debio-1347)	118.564
Molm13	PD 98059	118.051			Mv4-11	SB203580	118.582
Molm13	Erbstatin analog	118.062			Mv4-11	AG-17	118.624
Molm13	Crizotinib (PF-02341066)	118.151			Mv4-11	MK-2206 dihydrochloride	118.828
Molm13	Methyl hesperidin	118.28			Mv4-11	AZD1208	118.844
Molm13	CAY10571	118.3			Mv4-11	Gefitinib	118.85
Molm13	AG-1478	118.323			Mv4-11	Icaritin	118.897
Molm13	NQDI-1	118.392			Mv4-11	LFM-A13	118.933
Molm13	AZD9291	118.581			Mv4-11	SSR128129E	118.991
Molm13	XL019	118.589			Mv4-11	GDC-0032	119.02
Molm13	BEZ235 (NVP-BEZ235, Dactolisib)	118.606			Mv4-11	APY0201	119.063
Molm13	Notoginsenoside R1	118.632			Mv4-11	AZD8931 (Sapitinib)	119.148
Molm13	Trametinib (GSK1120212)	118.669			Mv4-11	Baricitinib†(Phosphate)	119.184
Molm13	BS-181	118.735			Mv4-11	Oclacitinib	119.263
Molm13	7,8-Dihydroxyflavone	118.781			Mv4-11	Lidocaine Hydrochloride hydrate	119.295
Molm13	Bay 11-7085	118.793			Mv4-11	FLT3-IN-2	119.298
Molm13	CAY10554	118.92			Mv4-11	Bisindolylmaleimide V	119.327
Molm13	ML167	118.99			Mv4-11	BMS-777607	119.33
Molm13	Ddr1-In-1	119.04			Mv4-11	SZL P1-41	119.354
Molm13	Azd6738	119.057			Mv4-11	PHA-767491	119.458
Molm13	WHI-P131	119.059			Mv4-11	A66	119.458
Molm13	SB590885	119.067			Mv4-11	NSC 663284	119.495
Molm13	Solcitinib	119.101			Mv4-11	BIX02189	119.495
Molm13	Selumetinib (AZD6244)	119.157			Mv4-11	CH5132799	119.509
Molm13	CH5132799	119.164			Mv4-11	AG-1296	119.517
Molm13	BMS-754807	119.203			Mv4-11	Nilotinib	119.522
Molm13	Danusertib (PHA-739358)	119.249			Mv4-11	N,N-Dimethylsphingosine	119.531
Molm13	SU 6668	119.516			Mv4-11	BMS 599626	119.661
Molm13	PI3065	119.539			Mv4-11	NVP-BEZ235	119.889
Molm13	SU11274	119.562			Mv4-11	Lapatinib ditosylate monohydrate	119.926
Molm13	Neratinib(HKI-272)	119.564			Mv4-11	CAY10574	119.971
Molm13	NH125	119.652			Mv4-11	Palbociclib	120.054
Molm13	Osu-03012	119.694			Mv4-11	Sunitinib	120.17
Molm13	Lavendustin C	119.723			Mv4-11	CHIR99021	120.29
Molm13	KT 5823	119.738			Mv4-11	Iso-Olomoucine	120.294
Molm13	Coumarin	119.784			Mv4-11	Poziotinib (HM781-36B)	120.481
Molm13	Pilaralisib (XL147)	119.812			Mv4-11	GSK2606414	120.518
Molm13	SC 79	119.883			Mv4-11	DMH1	120.608
Molm13	Motesanib (AMG-706)	120.037			Mv4-11	TCS PIM-1 1	120.609
Molm13	PP121	120.054			Mv4-11	SAR131675	120.622
Molm13	AZ191	120.16			Mv4-11	ISRIB	120.708
Molm13	CH5132799	120.177			Mv4-11	Entrectinib	120.764
Molm13	Wortmannin	120.226			Mv4-11	Phenformin hydrochloride	120.825
Molm13	Thiazovivin	120.23			Mv4-11	Gefitinib	120.839
Molm13	CAY10505	120.248			Mv4-11	GLPG0634 analogue	120.928
Molm13	Myricetin	120.264			Mv4-11	GNF-2	120.997
Molm13	LY294002	120.315			Mv4-11	SB-431542	121.113
Molm13	Fruquintinib	120.517			Mv4-11	LFM-A13	121.248
Molm13	Duvelisib (IPI-145, INK1197)	120.565			Mv4-11	LEE011	121.268
Molm13	TH588	120.619			Mv4-11	Momelotinib (CYT387)	121.277
Molm13	Apatinib	120.631			Mv4-11	MK8745	121.285
Molm13	LY-364947	120.79			Mv4-11	Duvelisib (IPI-145, INK1197)	121.555
Molm13	PF06463922	120.872			Mv4-11	GSK-2636771	121.606
Molm13	Kaempferitrin	121.026			Mv4-11	PF-4708671	121.609
Molm13	LEE011	121.046			Mv4-11	CGI1746	121.617
Molm13	CHIR99021	121.092			Mv4-11	LH-846	121.668
Molm13	AS 602801	121.182			Mv4-11	AEE788	121.706
Molm13	LY2090314	121.187			Mv4-11	SB-505124	121.723
Molm13	RG-14620	121.224			Mv4-11	WHI-P154	121.762
Molm13	CHIR98014	121.271			Mv4-11	Dabrafenib (GSK2118436)	121.834
Molm13	Lonidamine	121.344			Mv4-11	Honokiol	121.858
Molm13	MPI-0479605	121.469			Mv4-11	PP2	121.877
Molm13	GW2580	121.566			Mv4-11	CX-6258	121.966
Molm13	SB202190 (FHPI)	121.615			Mv4-11	Obacunone	121.974
Molm13	TBB(NSC 231634)	121.627			Mv4-11	AZ191	122.121
Molm13	Imatinib (mesylate)	121.643			Mv4-11	TDZD-8	122.365
Molm13	NSC 42834	121.648			Mv4-11	Ruxolitinib (INCB-18424) phosphate	122.391
Molm13	BGJ398 (NVP-BGJ398)	121.724			Mv4-11	WP1130	122.44
Molm13	CAY10574	121.773			Mv4-11	Tivantinib (ARQ 197)	122.514
Molm13	Baricitinib†(Phosphate)	121.778			Mv4-11	KU55933	122.571
Molm13	N,N-Dimethylsphingosine	121.957			Mv4-11	SC 79	122.67
Molm13	SGX-523	122.151			Mv4-11	TWS119	122.679
Molm13	Metformin hydrochloride	122.279			Mv4-11	PP2	122.84
Molm13	Asiatic acid	122.434			Mv4-11	Proglumide	122.92
Molm13	Ruxolitinib (INCB-18424) phosphate	122.522			Mv4-11	BAW2881	123.028
Molm13	SMI-4a	122.597			Mv4-11	DRB	123.099
Molm13	Icaritin	122.62			Mv4-11	NSC 663284	123.107
Molm13	Tideglusib	122.713			Mv4-11	LY-364947	123.11
Molm13	GSK923295	123.028			Mv4-11	Ro3280	123.293
Molm13	Cediranib (AZD2171)	123.162			Mv4-11	Lonidamine	123.311
Molm13	ZM 447439	123.196			Mv4-11	HMN214	123.366
Molm13	AS601245	123.25			Mv4-11	Y-27632 dihydrochloride	123.673
Molm13	SSR128129E	123.679			Mv4-11	Nilotinib (AMN-107)	123.931
Molm13	3-Methyladenine	123.698			Mv4-11	BML-275	123.996
Molm13	Bisindolylmaleimide VIII (acetate)	123.856			Mv4-11	CID-2011756	124.003
Molm13	Lidocaine Hydrochloride hydrate	123.91			Mv4-11	TTP 22	124.065
Molm13	Lonidamine	123.945			Mv4-11	PI3065	124.208
Molm13	KN-62	124.052			Mv4-11	Piceatannol	124.321
Molm13	Chelerythrine chloride	124.432			Mv4-11	OSI-906 (Linsitinib)	124.481
Molm13	Chloropyramine hydrochloride	124.523			Mv4-11	AR-A014418	124.581
Molm13	NVP 231	124.737			Mv4-11	GNE-0877	124.611
Molm13	ZSTK474	124.75			Mv4-11	Cyanoacetohydrazide	124.666
Molm13	SAR245409 (XL765)	124.778			Mv4-11	CEP-32496	124.698
Molm13	AS-605240	124.788			Mv4-11	2,3-Butanedione 2-Monoxime	124.77
Molm13	Axitinib	124.916			Mv4-11	Acalabrutinib	124.842
Molm13	PHA-767491	125.096			Mv4-11	AZ5104	125.107
Molm13	Ro-3306	125.147			Mv4-11	PF06463922	125.109
Molm13	(+)-Fangchinoline	125.169			Mv4-11	SKLB1002	125.22
Molm13	Canertinib (CI-1033)	125.337			Mv4-11	APY0201	125.234
Molm13	PF-06447475	125.42			Mv4-11	BMS-754807	125.281
Molm13	Bisindolylmaleimide XI (hydrochloride)	125.508			Mv4-11	Dabrafenib (GSK2118436)	125.518
Molm13	AG-17	125.584			Mv4-11	Axitinib	125.676
Molm13	KN-93	125.614			Mv4-11	ST638	125.687
Molm13	LDC1267	125.668			Mv4-11	ZM 323881 hydrochloride	125.691
Molm13	Pazopanib	126.119			Mv4-11	MRT67307	125.711
Molm13	1NM-PP1	126.174			Mv4-11	SB 203580 (hydrochloride)	125.893
Molm13	Adenosine 5'-monophosphate monohydrate	126.37			Mv4-11	Altiratinib(DCC2701)	126.021
Molm13	OSI-906 (Linsitinib)	126.473			Mv4-11	PD 173074	126.178
Molm13	Cyanoacetohydrazide	126.579			Mv4-11	PD 166326	126.352
Molm13	Tofacitinib (CP-690550) Citrate	126.6			Mv4-11	Acalabrutinib	126.408
Molm13	Gefitinib (ZD1839)	126.656			Mv4-11	SB-415286	126.479
Molm13	CHIR-98014	127.062			Mv4-11	Ensartinib	126.495
Molm13	TGX-221	127.296			Mv4-11	CAY10505	126.503
Molm13	CEP-33779	127.32			Mv4-11	Myricetin	126.677
Molm13	H-89 (hydrochloride)	127.337			Mv4-11	GDC-0032	126.714
Molm13	NH125	127.409			Mv4-11	PLX4720	126.749
Molm13	NU 6102	127.426			Mv4-11	SZL P1-41	126.97
Molm13	CAY10561	127.655			Mv4-11	AG-494	127.031
Molm13	SL-327	127.7			Mv4-11	CZC-54252	127.156
Molm13	NSC 663284	127.71			Mv4-11	PND-1186	127.185
Molm13	AZ 960	127.733			Mv4-11	PIK-293	127.242
Molm13	BLU9931	127.816			Mv4-11	Volasertib (BI 6727)	127.259
Molm13	FLT3-IN-1	128.003			Mv4-11	Erbstatin analog	127.349
Molm13	AG-99	128.073			Mv4-11	GSK923295	127.425
Molm13	Brivanib Alaninate (BMS-582664)	128.394			Mv4-11	LY294002	127.427
Molm13	Cyanoacetohydrazide	128.48			Mv4-11	U-0126	127.468
Molm13	PD173074	128.486			Mv4-11	RKI-1447	127.468
Molm13	PF-4708671	128.556			Mv4-11	TG100-115	127.585
Molm13	17?-hydroxy Wortmannin	129.017			Mv4-11	AS-604850	127.796
Molm13	Bosutinib	129.202			Mv4-11	Pyridoxine	127.996
Molm13	NQDI-1	129.251			Mv4-11	Brigatinib	128.163
Molm13	L-779,450	129.333			Mv4-11	Fangchinoline	128.345
Molm13	Sunitinib	129.363			Mv4-11	PRT062607 (P505-15, BIIB057) hydrochloride	128.371
Molm13	CAY10657	129.383			Mv4-11	AS601245	128.625
Molm13	AS-605240	129.501			Mv4-11	BMS-754807	128.85
Molm13	PF 431396	129.564			Mv4-11	CHIR-98014	129.001
Molm13	LH-846	129.764			Mv4-11	Rigosertib (ON-01910)	129.667
Molm13	LY2090314	129.778			Mv4-11	GW2580	130.303
Molm13	Psoralidin	129.834			Mv4-11	CAY10621	130.564
Molm13	DB07268	129.956			Mv4-11	U-0126	130.59
Molm13	Iso-Olomoucine	130.226			Mv4-11	Coumarin	130.752
Molm13	A 769662	130.273			Mv4-11	NVP-BVU972	130.846
Molm13	AP26113	130.521			Mv4-11	ZSTK474	130.906
Molm13	H-9 (hydrochloride)	130.659			Mv4-11	SMI-4a	131.1
Molm13	Vandetanib (ZD6474)	130.92			Mv4-11	BIX02188	131.581
Molm13	Nilotinib	130.963			Mv4-11	AZD5438	131.683
Molm13	SGX-523	131.218			Mv4-11	Methyl hesperidin	131.72
Molm13	Corosolic acid	131.331			Mv4-11	AZD1208	131.841
Molm13	S-Ruxolitinib	131.593			Mv4-11	JNK-IN-7	132.175
Molm13	CNX-774	131.608			Mv4-11	TSU-68 (SU6668, Orantinib)	132.411
Molm13	Dasatinib	131.643			Mv4-11	Losmapimod (GW856553X)	132.54
Molm13	Bisindolylmaleimide V	131.741			Mv4-11	CAY10622	132.854
Molm13	URMC-099	132.237			Mv4-11	CAY10621	132.883
Molm13	Briciclib	132.317			Mv4-11	Lenvatinib (E7080)	133.013
Molm13	ST638	132.344			Mv4-11	CH5132799	133.201
Molm13	PD 173074	132.738			Mv4-11	CUDC-101	133.482
Molm13	CAY10622	135.218			Mv4-11	AG-82	133.512
Molm13	JNJ-10198409	136.324			Mv4-11	ZM 447439	133.694
Molm13	SB-505124	136.397			Mv4-11	JNJ-10198409	133.938
Molm13	CX-6258	136.419			Mv4-11	PP121	134.442
Molm13	PF-04217903	136.812			Mv4-11	Masitinib (AB1010)	134.833
Molm13	Forsythin	137.505			Mv4-11	GSK2656157	135.183
Molm13	KRCA-0008	138.01			Mv4-11	Erlotinib hydrochloride	135.679
Molm13	LY294002	138.817			Mv4-11	PI3-Kinase ? Inhibitor 2	136.01
Molm13	JNK-IN-7	140.605			Mv4-11	Myricetrin	136.334
Molm13	Ensartinib	140.96			Mv4-11	BIX02188	136.424
Molm13	KN-92 (hydrochloride)	141.639			Mv4-11	AT13148	136.799
Molm13	Baricitinib (LY3009104, INCB028050)	143.461			Mv4-11	Imatinib (mesylate)	136.946
Molm13	Brigatinib	143.958			Mv4-11	Bisindolylmaleimide VIII (acetate)	137.341
Molm13	PQ401	145.833			Mv4-11	Leflunomide	138.566
Molm13	TCS PIM-1 1	145.899			Mv4-11	Genistein	138.957
Molm13	SKLB1002	148.268			Mv4-11	Psoralidin	140.184
Molm13	D-erythro-Sphingosine C-18	149.071			Mv4-11	SRPIN340	140.72
Molm13	CAY10578	152.769			Mv4-11	PQ401	141.752
Molm13	SZL P1-41	153.312			Mv4-11	URMC-099	142.98
Molm13	WP1130	155.024			Mv4-11	PLX4720	144.125
Molm13	Lapatinib ditosylate monohydrate	159.576			Mv4-11	Vandetanib (ZD6474)	145.908
