# Supplementary material for: Efficacy and Synergy of Small Molecule Inhibitors Targeting FLT3-ITD+ Acute Myeloid Leukemia
Source: Cancers (Basel). 2021 Dec 8;13(24):6181. doi: 10.3390/cancers13246181 (PMC8699584; doi:10.3390/cancers13246181)
Supplement: Supplementary file 1 [file cancers-13-06181-s001.zip › cancers-1494412-Table S2_SwissTargetPrediction.xlsx]

## Sheet: Sheet1
Target	Common name	Uniprot ID	ChEMBL ID	Target Class	Probability*	Known actives (3D/2D)
MAP kinase signal-integrating kinase 2	MKNK2	Q9HBH9	CHEMBL4204	Kinase	0.181153	6 / 15
MAP kinase-interacting serine/threonine-protein kinase MNK1	MKNK1	Q9BUB5	CHEMBL4718	Kinase	0.145724	5 / 11
Tyrosine-protein kinase SRC	SRC	P12931	CHEMBL267	Kinase	0.0743923	33 / 7
Serine/threonine-protein kinase B-raf	BRAF	P15056	CHEMBL5145	Kinase	0.0743923	101 / 121
Tyrosine-protein kinase ABL	ABL1	P00519	CHEMBL1862	Kinase	0.0743923	20 / 18
Tyrosine-protein kinase LCK	LCK	P06239	CHEMBL258	Kinase	0.0743923	16 / 12
Vascular endothelial growth factor receptor 2	KDR	P35968	CHEMBL279	Kinase	0.0743923	57 / 130
Tyrosine-protein kinase TIE-2	TEK	Q02763	CHEMBL4128	Kinase	0.0743923	7 / 12
Tyrosine-protein kinase Lyn	LYN	P07948	CHEMBL3905	Kinase	0.0743923	11 / 1
Serine/threonine-protein kinase RAF	RAF1	P04049	CHEMBL1906	Kinase	0.0743923	11 / 20
Epidermal growth factor receptor erbB1	EGFR	P00533	CHEMBL203	Kinase	0.0743923	15 / 121
Fibroblast growth factor receptor 3	FGFR3	P22607	CHEMBL2742	Kinase	0.0743923	26 / 1
Tyrosine-protein kinase FYN	FYN	P06241	CHEMBL1841	Kinase	0.0743923	2 / 2
Inhibitor of nuclear factor kappa B kinase beta subunit	IKBKB	O14920	CHEMBL1991	Kinase	0.0743923	2 / 1
Platelet-derived growth factor receptor alpha	PDGFRA	P16234	CHEMBL2007	Kinase	0.0743923	5 / 5
Ephrin type-A receptor 2	EPHA2	P29317	CHEMBL2068	Kinase	0.0743923	4 / 3
Tyrosine-protein kinase YES	YES1	P07947	CHEMBL2073	Kinase	0.0743923	3 / 1
Tyrosine-protein kinase BLK	BLK	P51451	CHEMBL2250	Kinase	0.0743923	2 / 2
Nerve growth factor receptor Trk-A	NTRK1	P04629	CHEMBL2815	Kinase	0.0743923	4 / 1
Tyrosine-protein kinase JAK2	JAK2	O60674	CHEMBL2971	Kinase	0.0743923	19 / 2
Ephrin type-B receptor 2	EPHB2	P29323	CHEMBL3290	Kinase	0.0743923	2 / 1
Inhibitor of NF-kappa-B kinase (IKK)	CHUK	O15111	CHEMBL3476	Kinase	0.0743923	2 / 1
Tyrosine-protein kinase receptor UFO	AXL	P30530	CHEMBL4895	Kinase	0.0743923	2 / 2
Discoidin domain-containing receptor 2	DDR2	Q16832	CHEMBL5122	Kinase	0.0743923	6 / 4
Ribosomal protein S6 kinase 1	RPS6KB1	P23443	CHEMBL4501	Kinase	0.0743923	4 / 160
Stem cell growth factor receptor	KIT	P10721	CHEMBL1936	Kinase	0.0743923	11 / 5
Insulin receptor	INSR	P06213	CHEMBL1981	Kinase	0.0743923	8 / 6
Tyrosine-protein kinase HCK	HCK	P08631	CHEMBL3234	Kinase	0.0743923	7 / 3
Kinesin-1 heavy chain/ Tyrosine-protein kinase receptor RET	RET	P07949	CHEMBL2041	Kinase	0.0743923	7 / 8
Serine/threonine-protein kinase Aurora-B	AURKB	Q96GD4	CHEMBL2185	Kinase	0.0743923	7 / 62
MAP kinase p38 alpha	MAPK14	Q16539	CHEMBL260	Kinase	0.0743923	5 / 16
Dual specificity protein kinase TTK	TTK	P33981	CHEMBL3983	Kinase	0.0743923	3 / 3
Platelet-derived growth factor receptor beta	PDGFRB	P09619	CHEMBL1913	Kinase	0.0743923	5 / 34
Tyrosine-protein kinase receptor FLT3	FLT3	P36888	CHEMBL1974	Kinase	0.0743923	6 / 29
Fibroblast growth factor receptor 2	FGFR2	P21802	CHEMBL4142	Kinase	0.0743923	2 / 4
Tyrosine-protein kinase JAK3	JAK3	P52333	CHEMBL2148	Kinase	0.0743923	13 / 21
Leucine-rich repeat serine/threonine-protein kinase 2	LRRK2	Q5S007	CHEMBL1075104	Kinase	0.0743923	1 / 9
Homeodomain-interacting protein kinase 4	HIPK4	Q8NE63	CHEMBL1075167	Kinase	0.0743923	1 / 1
Serine/threonine-protein kinase TAO2	TAOK2	Q9UL54	CHEMBL1075195	Kinase	0.0743923	1 / 1
Serine/threonine-protein kinase/endoribonuclease IRE1	ERN1	O75460	CHEMBL1163101	Enzyme	0.0743923	1 / 1
Serine/threonine-protein kinase MAK	MAK	P20794	CHEMBL1163106	Kinase	0.0743923	1 / 1
STE20/SPS1-related proline-alanine-rich protein kinase	STK39	Q9UEW8	CHEMBL1163108	Kinase	0.0743923	1 / 1
Cyclin-dependent kinase-like 5	CDKL5	O76039	CHEMBL1163112	Kinase	0.0743923	1 / 1
Cyclin-dependent kinase-like 3	CDKL3	Q8IVW4	CHEMBL1163117	Kinase	0.0743923	1 / 1
Mitogen-activated protein kinase kinase kinase 6	MAP3K6	O95382	CHEMBL1163123	Kinase	0.0743923	1 / 1
Mitogen-activated protein kinase kinase kinase 13	MAP3K13	O43283	CHEMBL1163124	Kinase	0.0743923	1 / 1
Serine/threonine-protein kinase ICK	ICK	Q9UPZ9	CHEMBL1163126	Kinase	0.0743923	1 / 1
Cyclin-dependent kinase 13	CDK13	Q14004	CHEMBL1795192	Enzyme	0.0743923	1 / 1
Macrophage colony stimulating factor receptor	CSF1R	P07333	CHEMBL1844	Kinase	0.0743923	5 / 15
Vascular endothelial growth factor receptor 1	FLT1	P17948	CHEMBL1868	Kinase	0.0743923	10 / 2
Dual serine/threonine and tyrosine protein kinase	DSTYK	Q6XUX3	CHEMBL1908386	Enzyme	0.0743923	1 / 1
Mitogen-activated protein kinase kinase kinase 12	MAP3K12	Q12852	CHEMBL1908389	Enzyme	0.0743923	1 / 1
Vascular endothelial growth factor receptor 3	FLT4	P35916	CHEMBL1955	Kinase	0.0743923	4 / 12
Dual specificity mitogen-activated protein kinase kinase 3	MAP2K3	P46734	CHEMBL2109	Kinase	0.0743923	1 / 1
c-Jun N-terminal kinase 1	MAPK8	P45983	CHEMBL2276	Kinase	0.0743923	1 / 2
Casein kinase I gamma 1	CSNK1G1	Q9HCP0	CHEMBL2426	Kinase	0.0743923	1 / 1
Death-associated protein kinase 3	DAPK3	O43293	CHEMBL2468	Kinase	0.0743923	1 / 1
CaM kinase I alpha	CAMK1	Q14012	CHEMBL2493	Kinase	0.0743923	1 / 1
CaM kinase IV	CAMK4	Q16566	CHEMBL2494	Kinase	0.0743923	1 / 1
Serine/threonine-protein kinase Chk2	CHEK2	O96017	CHEMBL2527	Kinase	0.0743923	1 / 1
Casein kinase I gamma 2	CSNK1G2	P78368	CHEMBL2543	Kinase	0.0743923	1 / 1
Protein kinase C (PKC)	PRKD3	O94806	CHEMBL2595	Kinase	0.0743923	1 / 1
Tyrosine-protein kinase SYK	SYK	P43405	CHEMBL2599	Kinase	0.0743923	2 / 2
Tyrosine-protein kinase CSK	CSK	P41240	CHEMBL2634	Kinase	0.0743923	1 / 1
c-Jun N-terminal kinase 3	MAPK10	P53779	CHEMBL2637	Kinase	0.0743923	1 / 1
Macrophage-stimulating protein receptor	MST1R	Q04912	CHEMBL2689	Kinase	0.0743923	4 / 1
Mitogen-activated protein kinase kinase kinase 11	MAP3K11	Q16584	CHEMBL2708	Kinase	0.0743923	1 / 1
myosin light chain kinase 2	MYLK2	Q9H1R3	CHEMBL2777	Kinase	0.0743923	1 / 1
Casein kinase I delta	CSNK1D	P48730	CHEMBL2828	Kinase	0.0743923	1 / 1
Tyrosine-protein kinase JAK1	JAK1	P23458	CHEMBL2835	Kinase	0.0743923	1 / 2
Glycogen synthase kinase-3 alpha	GSK3A	P49840	CHEMBL2850	Kinase	0.0743923	1 / 1
Dual specificity mitogen-activated protein kinase kinase 4	MAP2K4	P45985	CHEMBL2897	Kinase	0.0743923	1 / 1
cAMP-dependent protein kinase beta-1 catalytic subunit	PRKACB	P22694	CHEMBL2918	Kinase	0.0743923	1 / 1
MAP kinase p38 delta	MAPK13	O15264	CHEMBL2939	Kinase	0.0743923	1 / 1
Tyrosine-protein kinase ITK/TSK	ITK	Q08881	CHEMBL2959	Kinase	0.0743923	1 / 3
Rho-associated protein kinase 2	ROCK2	O75116	CHEMBL2973	Kinase	0.0743923	2 / 19
Serine/threonine-protein kinase PAK 3	PAK3	O75914	CHEMBL2999	Kinase	0.0743923	1 / 1
Cyclin-dependent kinase 2	CDK2	P24941	CHEMBL301	Kinase	0.0743923	2 / 3
Cyclin-dependent kinase 7	CDK7	P50613	CHEMBL3055	Kinase	0.0743923	1 / 1
Cyclin-dependent kinase 9	CDK9	P50750	CHEMBL3116	Kinase	0.0743923	1 / 2
Ribosomal protein S6 kinase alpha 4	RPS6KA4	O75676	CHEMBL3125	Kinase	0.0743923	1 / 1
Rho-associated protein kinase 1	ROCK1	Q13464	CHEMBL3231	Kinase	0.0743923	1 / 5
Cyclin-dependent kinase 4	CDK4	P11802	CHEMBL331	Kinase	0.0743923	1 / 1
Interleukin-1 receptor-associated kinase 1	IRAK1	P51617	CHEMBL3357	Kinase	0.0743923	1 / 1
Dual specificity mitogen-activated protein kinase kinase 7	MAP2K7	O14733	CHEMBL3530	Kinase	0.0743923	1 / 1
Tyrosine-protein kinase TYK2	TYK2	P29597	CHEMBL3553	Kinase	0.0743923	1 / 1
Fibroblast growth factor receptor 1	FGFR1	P11362	CHEMBL3650	Kinase	0.0743923	8 / 5
Hepatocyte growth factor receptor	MET	P08581	CHEMBL3717	Kinase	0.0743923	17 / 30
Tyrosine-protein kinase BMX	BMX	P51813	CHEMBL3834	Kinase	0.0743923	1 / 1
LIM domain kinase 1	LIMK1	P53667	CHEMBL3836	Kinase	0.0743923	1 / 8
Protein kinase C mu	PRKD1	Q15139	CHEMBL3863	Kinase	0.0743923	1 / 1
Mixed lineage kinase 7	MAP3K20	Q9NYL2	CHEMBL3886	Kinase	0.0743923	1 / 1
Ribosomal protein S6 kinase alpha 2	RPS6KA2	Q15349	CHEMBL3906	Kinase	0.0743923	1 / 1
Protein kinase C theta	PRKCQ	Q04759	CHEMBL3920	Kinase	0.0743923	1 / 1
Serine/threonine-protein kinase Aurora-C	AURKC	Q9UQB9	CHEMBL3935	Kinase	0.0743923	1 / 1
Mitogen-activated protein kinase kinase kinase 1	MAP3K1	Q13233	CHEMBL3956	Kinase	0.0743923	1 / 1
MAP kinase p38 beta	MAPK11	Q15759	CHEMBL3961	Kinase	0.0743923	1 / 1
Fibroblast growth factor receptor 4	FGFR4	P22455	CHEMBL3973	Kinase	0.0743923	1 / 1
Serine/threonine-protein kinase 10	STK10	O94804	CHEMBL3981	Kinase	0.0743923	1 / 1
Tyrosine-protein kinase FER	FER	P16591	CHEMBL3982	Kinase	0.0743923	1 / 1
